# Supplementary material for: Diabetes mellitus and tuberculosis, a systematic review and meta-analysis with sensitivity analysis for studies comparable for confounders
Source: PubMed Central journal article supplement (PMC8664214; doi:10.1371/journal.pone.0261246), 2021-12-10

S2 Fig. Funnel chart for publications of the association between diabetes and tuberculosis in case control studies.

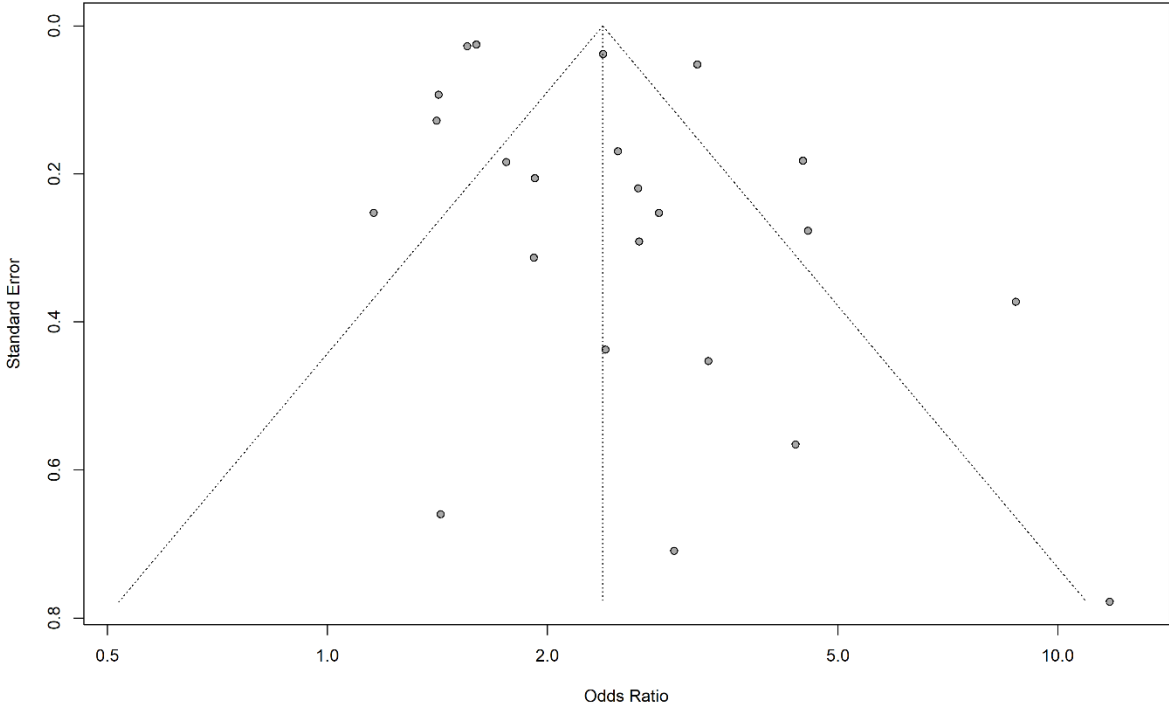

Supplement: pone.0261246.s002.pdf [file pone.0261246.s002.pdf]
