# Supplementary material for: Diabetes mellitus and tuberculosis, a systematic review and meta-analysis with sensitivity analysis for studies comparable for confounders
Source: PubMed Central journal article supplement (PMC8664214; doi:10.1371/journal.pone.0261246), 2021-12-10
Supplement: pone.0261246.s005.pdf [file pone.0261246.s005.pdf]

**S2 Table: Search strategy In Pubmed**

| <b>Search</b> |          | <b>Search terms</b>                                                                                                                                                                                                                                                                | <b>Items found</b> |
|---------------|----------|------------------------------------------------------------------------------------------------------------------------------------------------------------------------------------------------------------------------------------------------------------------------------------|--------------------|
| #1            | Outcomes | Tuberculosis OR Tubercul* OR TB OR Latent Tuberculosis OR Multidrug-Resistant Tuberculosis OR antitubercul* OR MDR-TB OR Mycobacterium tuberculosis OR Mycobacterium tuberculosis Infection OR TB OR koch's disease OR koch disease                                                | 368,051            |
| #2            | Exposure | Diabetes OR Diabetes Mellitus OR Diabet* OR “insulin resistance” OR T2DM OR T1DM OR Non-insulin-dependent diabetes mellitus OR NIDDM OR IDDM OR Insulin-Dependent Diabetes Mellitus OR hyperglyce* OR hyperlycae* OR glucose toleran* OR glucose intoleran* OR glyce* OR glycaemi* | 879,956            |
| #3            |          | #1 AND #2                                                                                                                                                                                                                                                                          | 7,014              |
| #4            |          | Limit #3 in English and French languages                                                                                                                                                                                                                                           | 5,819              |
