# Supplementary material for: Diabetes mellitus and tuberculosis, a systematic review and meta-analysis with sensitivity analysis for studies comparable for confounders
Source: PubMed Central journal article supplement (PMC8664214; doi:10.1371/journal.pone.0261246), 2021-12-10
Supplement: pone.0261246.s006.pdf [file pone.0261246.s006.pdf]

S3 Table. Items for risk of bias assessment

|                       | <b>The Joanna Briggs Institute Scale for cohort studies</b>                                                                                        | <b>case control studies</b>                                                                                                                        | <b>cross sectional studies</b>                                                                                                                    |
|-----------------------|----------------------------------------------------------------------------------------------------------------------------------------------------|----------------------------------------------------------------------------------------------------------------------------------------------------|---------------------------------------------------------------------------------------------------------------------------------------------------|
|                       | 1) Were the DM+ and DM- groups similar and recruited from the same population?                                                                     | 1) Were the TB+ and TB- groups comparable other than presence of TB in cases or absence of TB in controls?                                         | 1) Were the criteria for inclusion in the sample clearly defined?                                                                                 |
|                       | 2) Were the DM measured similarly to assign people to both DM+ and DM- groups?                                                                     | 2) Were TB+ and TB- matched appropriately?                                                                                                         | 2) Were the study subjects and the setting described in detail?                                                                                   |
|                       | 3) Was the DM measured in a valid and reliable way?                                                                                                | 3) Were the same criteria used for identification of TB+ and TB-?                                                                                  | 3) Was the DM measured in a valid and reliable way?                                                                                               |
|                       | 4) Were confounding factors identified?                                                                                                            | 4) Was DM measured in a standard, valid and reliable way?                                                                                          | 4) Were objective, standard criteria used for measurement of the condition?                                                                       |
|                       | 5) Were strategies to deal with confounding factors stated?                                                                                        | 5) Was DM measured in the same way for TB+ and TB-?                                                                                                | 5) Were confounding factors identified?                                                                                                           |
|                       | 6) Were the DM+ and DM- free of the TB at the start of the study (or at the moment of DM)?                                                         | 6) Were confounding factors identified?                                                                                                            | 6) Were strategies to deal with confounding factors stated?                                                                                       |
|                       | 7) Were the TB measured in a valid and reliable way?                                                                                               | 7) Were strategies to deal with confounding factors stated?                                                                                        | 7) Were the TB measured in a valid and reliable way?                                                                                              |
|                       | 8) Was the follow up time reported and sufficient to be long enough for TB to occur?                                                               | 8) Were TB assessed in a standard, valid and reliable way for TB+ and TB-?                                                                         | 8) Was appropriate statistical analysis used?                                                                                                     |
|                       | 9) Was follow up complete, and if not, were the reasons to loss to follow up described and explored?                                               | 9) Was the DM period of interest long enough to be meaningful?                                                                                     |                                                                                                                                                   |
|                       | 10) Were strategies to address incomplete follow up utilized?                                                                                      | 10) Was appropriate statistical analysis used?                                                                                                     |                                                                                                                                                   |
|                       | 11) Was appropriate statistical analysis used?                                                                                                     |                                                                                                                                                    |                                                                                                                                                   |
| <b>Total score</b>    | <b>11</b>                                                                                                                                          | 10                                                                                                                                                 | 8                                                                                                                                                 |
| <b>Interpretation</b> | <ul style="list-style-type: none"> <li>• 9-11: Low risk of bias</li> <li>• 5-8: Moderate risk of bias</li> <li>• 0-4: High risk of bias</li> </ul> | <ul style="list-style-type: none"> <li>• 8-10: Low risk of bias</li> <li>• 5-7: Moderate risk of bias</li> <li>• 0-4: High risk of bias</li> </ul> | <ul style="list-style-type: none"> <li>• 7-8: Low risk of bias</li> <li>• 4-6: Moderate risk of bias</li> <li>• 0-3: High risk of bias</li> </ul> |
