# Supplementary material for: Diabetes mellitus and tuberculosis, a systematic review and meta-analysis with sensitivity analysis for studies comparable for confounders
Source: PubMed Central journal article supplement (PMC8664214; doi:10.1371/journal.pone.0261246), 2021-12-10
Supplement: pone.0261246.s007.pdf [file pone.0261246.s007.pdf]

S4 Table. Main reasons of exclusion of eligible studies

| N° | Author, Year      | Title                                                                                                                                                                                   | Reason of exclusion                    |
|----|-------------------|-----------------------------------------------------------------------------------------------------------------------------------------------------------------------------------------|----------------------------------------|
| 1  | Abdelbary, 2016   | Tuberculosis-diabetes epidemiology in the border and non-border regions of Tamaulipas, Mexico.                                                                                          | Incorrect study design                 |
| 2  | Abedi, 2019       | The impact of diabetics and smoking on gender differences of smear positive pulmonary tuberculosis incidence.                                                                           | Incorrect study design, No data on TB- |
| 3  | Abera, 2018       | Pulmonary Tuberculosis and Associated Factors Among Diabetic Patients Attending Hawassa Adare Hospital, Southern Ethiopia.                                                              | Incorrect study design                 |
| 4  | Abou-Khatwa, 1963 | COMPLICATIONS OF DIABETES MELLITUS (STUDY OF 2012 CASES).                                                                                                                               | No abstract and full text available    |
| 5  | Abreu, 2020       | Tuberculosis and diabetes: association with sociodemographic characteristics and diagnosis and treatment of tuberculosis. Brazil, 2007-2011.                                            | Incorrect study design                 |
| 6  | Abreu, 2017       | Tuberculosis and diabetes: probabilistic linkage of databases to study the association between both diseases.                                                                           | Incorrect study design                 |
| 7  | Abu-Ashour, 2018  | Diabetes and the occurrence of infection in primary care: a matched cohort study.                                                                                                       | No outcome data                        |
| 8  | Achanta, 2013     | Screening tuberculosis patients for diabetes in a tribal area in South India.                                                                                                           | Incorrect study design                 |
| 9  | Achhra, 2014      | Relationship between hyperglycemia and the risk of tuberculosis in Asian HIV-positive individuals in the antiretroviral therapy era: cohort study.                                      | No DM - group, No data on TB-          |
| 10 | Agarwal, 2016     | The association between diabetes and tuberculosis may be the next challenge for global tuberculosis control worldwide.                                                                  | Incorrect study population             |
| 11 | Ahmed, 2017       | Association between pulmonary tuberculosis and Type 2 diabetes in Sudanese patients.                                                                                                    | No data on TB-                         |
| 12 | Airaghi, 2006     | Negative association between occurrence of type 1 diabetes and tuberculosis incidence at population level.                                                                              | No DM + group, No DM - group           |
| 13 | Alavi, 2014       | Comparison of epidemiological, clinical, laboratory and radiological features of hospitalized diabetic and non-diabetic patients with pulmonary tuberculosis at razi hospital in ahvaz. | Incorrect study design                 |
| 14 | Alavi, 2012       | Pulmonary tuberculosis and diabetes mellitus: Co-existence of both diseases in patients admitted in a teaching hospital in the southwest of Iran.                                       | Incorrect study population             |
| 15 | Alimpic, 1970     | Diabetes mellitus and pulmonary tuberculosis.                                                                                                                                           | No abstract and full text available    |
| 16 | Alvarez, 2014     | Taima (stop) TB: the impact of a multifaceted TB awareness and door-to-door campaign in residential areas of high risk for TB in Iqaluit, Nunavut.                                      | No data on TB-                         |
| 17 | Araujo, 2013      | L-methionine placental uptake: characterization and modulation in gestational diabetes mellitus.                                                                                        | Incorrect study design                 |
| 18 | Arnedo-pena, 2015 | Vitamin D status and incidence of tuberculosis infection conversion in contacts of pulmonary tuberculosis patients: a prospective cohort study.                                         | Incorrect study design                 |
| 19 | Asanov, 1997      | Surgical treatment of pulmonary tuberculosis in patients with diabetes mellitus.                                                                                                        | No abstract and full text available    |
| 20 | Asante-poku, 2019 | TB-diabetes co-morbidity in Ghana: The importance of Mycobacterium africanum infection.                                                                                                 | Incorrect study design                 |
| 21 | Asberg, 2006      | Calcineurin inhibitor avoidance with daclizumab, mycophenolate mofetil, and prednisolone in DR-matched de novo kidney transplant recipients.                                            | Incorrect study population             |
| 22 | Baghaei, 2009     | Risk Factors Associated with Multidrug-Resistant Tuberculosis.                                                                                                                          | No data on outcome                     |
| 23 | Balde, 2006       | Associated tuberculosis and diabetes in Conakry, Guinea: Prevalence and clinical characteristics.                                                                                       | Incorrect study design                 |

|    |                          |                                                                                                                                                                                       |                                           |
|----|--------------------------|---------------------------------------------------------------------------------------------------------------------------------------------------------------------------------------|-------------------------------------------|
| 24 | Bashar, 2001             | Increased incidence of multidrug-resistant tuberculosis in diabetic patients on the Bellevue Chest Service, 1987 to 1997.                                                             | Incorrect study population                |
| 25 | Bashar, 2001             | Increased incidence of multidrug-resistant tuberculosis in diabetic patients on the Bellevue Chest Service, 1987 to 1997.                                                             | Duplicate study                           |
| 26 | Bennett, 2014            | Prevalence and treatment of latent tuberculosis infection among newly arrived refugees in San Diego County, January 2010-October 2012.                                                | Incorrect study design                    |
| 27 | Benoît, 2017             | Association of Diabetes and Tuberculosis Disease among US-Bound Adult Refugees, 2009-2014.                                                                                            | No data on TB-                            |
| 28 | Boillat-blanco, 2016     | Association between tuberculosis, diabetes and 25 hydroxyvitamin D in Tanzania: A longitudinal case control study.                                                                    | Duplicate study                           |
| 29 | Bridon, 2015             | Diabetes: A Contributor to Tuberculosis in Tropical Australia.                                                                                                                        | No data on TB-                            |
| 30 | Bronz, 2019              | Association between diabetes mellitus and mortality among patients with tuberculosis.                                                                                                 | Comment on an article                     |
| 31 | Byberg, 2012             | Diabetes is a risk factor for tuberculosis in the Inuit population of Greenland.                                                                                                      | Editorial                                 |
| 32 | Carriera , 2012          | Impact of diabetes on the presenting features of tuberculosis in hospitalized patients.                                                                                               | Not write in english or in french         |
| 33 | Carrion-Torres, 2015     | Characteristics of the diagnosis and treatment of pulmonary tuberculosis in patients with and without diabetes mellitus type 2.                                                       | Incorrect study population                |
| 34 | Cegielki, 2012           | Nutritional risk factors for tuberculosis among adults in the United States, 1971-1992.                                                                                               | No data on DM                             |
| 35 | Chang, 2011              | Effect of type 2 diabetes mellitus on the clinical severity and treatment outcome in patients with pulmonary tuberculosis: a potential role in the emergence of multidrug-resistance. | Incorrect study population                |
| 36 | Chan-yeung, 2006         | Prevalence and determinants of positive tuberculin reactions of residents in old age homes in Hong Kong.                                                                              | Not full text                             |
| 37 | Goldhaber- Fiebert, 2011 | Diabetes mellitus and tuberculosis in countries with high tuberculosis burdens: individual risks and social determinants.                                                             | Duplicate study                           |
| 38 | Chen , 2013              | Pulmonary tuberculosis incidence and risk factors in rural areas of China: a cohort study.                                                                                            | Incorrect study design                    |
| 39 | Chukanova, 2000          | Epidemiological and immunogenetic analysis of tuberculosis and diabetes mellitus association.                                                                                         | Not in french or english                  |
| 40 | Coker, 2006              | Risk factors for pulmonary tuberculosis in Russia: case-control study.                                                                                                                | Not possible to extract data from TB & DM |
| 41 | Defang, 2014             | Screening for tuberculosis and LTBI in diabetes patients, Pohnpei, Federated States of Micronesia.                                                                                    | Incorrect study population                |
| 42 | Delgado- Sanchez, 2015   | Association of Pulmonary Tuberculosis and Diabetes in Mexico: Analysis of the National Tuberculosis Registry 2000-2012.                                                               | Incorrect study population                |
| 43 | Demlow, 2015             | Increased risk of tuberculosis among foreign-born persons with diabetes in California, 2010-2012.                                                                                     | Incorrect study population                |
| 44 | Deshmukh, 2020           | Assessment of the Xpert assay among adult pulmonary tuberculosis suspects with and without diabetes mellitus.                                                                         | Incorrect study design                    |
| 45 | Destiany, 2020           | Risk factor of pulmonary tuberculosis among people with diabetes mellitus in Makassar.                                                                                                | Incorrect study design                    |
| 46 | Dobler, 2012             | Risk of tuberculosis among people with diabetes mellitus: an Australian nationwide cohort study.                                                                                      | Incorrect study population                |
| 47 | Du, 2017                 | Clinical significance of serum CA-125, CA19-9 and CEA in pulmonary tuberculosis with and without type 2 diabetes.                                                                     | No abstract and full text available       |
| 48 | Dyck, 2007               | The relationship between diabetes and tuberculosis in Saskatchewan - Comparison of registered Indians and other Saskatchewan people.                                                  | Incorrect study design                    |
| 49 | Fisher- Hoch, 2008       | Type 2 diabetes and multidrug-resistant tuberculosis.                                                                                                                                 | Incorrect study population                |
| 50 | Fossati, 1965            | ON THE ASSOCIATION OF PULMONARY TUBERCULOSIS AND DIABETES MELLITUS. RESULTS                                                                                                           | Not found                                 |

|    |                           |                                                                                                                                                                                               |                                         |
|----|---------------------------|-----------------------------------------------------------------------------------------------------------------------------------------------------------------------------------------------|-----------------------------------------|
|    |                           | OBTAINED ADMINISTERING TO THESE PATIENTS AN ORAL ANTIDIABETIC.                                                                                                                                |                                         |
| 51 | Fossati, 1969             | [Associated diabetes and pulmonary tuberculosis: occurrence, development, mortality and causes of death; statistical study of Arab-Libyan patients in Cyrene and covering the 10 past years]. | No abstract and full text available     |
| 52 | Gedfew, 2020              | Incidence and Predictors of Tuberculosis among Adult Diabetic Patients, Debre Markos Referral Hospital, Northwest Ethiopia, 2018: A Retrospective Cohort Study.                               | No DM - group                           |
| 53 | Goldhalber- Fiebert, 2011 | Diabetes mellitus and tuberculosis in countries with high tuberculosis burdens: individual risks and social determinants.                                                                     | Incorrect study population              |
| 54 | Gomez-Gomez, 2015         | Diabetes and Other Risk Factors for Multi-drug Resistant Tuberculosis in a Mexican Population with Pulmonary Tuberculosis: Case Control Study.                                                | Incorrect study population              |
| 55 | Greuel, 1958              | Active pulmonary tuberculosis & diabetes mellitus.                                                                                                                                            | No abstract and full text available     |
| 56 | Hafez, 2013               | Detection of extensively drug resistant pulmonary tuberculosis.                                                                                                                               | Incorrect study population              |
| 57 | HARRIES, 2019             | Having diabetes and being underweight in Asia: a potent risk factor for tuberculosis.                                                                                                         | Editorial                               |
| 58 | Hsu, 2012                 | Diabetes is associated with drug-resistant tuberculosis in Eastern Taiwan Short communication.                                                                                                | Incorrect study population              |
| 59 | Hu, 2013                  | Increased risk of tuberculosis in patients with end-stage renal disease: a population-based cohort study in Taiwan, a country of high incidence of end-stage renal disease.                   | Incorrect study population              |
| 60 | Jackson, 2013             | S57 Diabetes and latent tuberculosis infection: nested case-control study within the PREDICT cohort.                                                                                          | not possible to extract data on outcome |
| 61 | Jacob, 2017               | Clinical interpretation of the anti-tuberculosis drug concentrations in diabetic and non-diabetic tuberculosis patients.                                                                      | Incorrect study population              |
| 62 | Jinhong, 2005             | Risk Factors for Primary Multidrug Resistant Tuberculosis.                                                                                                                                    | Incorrect study population              |
| 63 | Jitmuang, 2015            | PREVALENCE AND FACTORS ASSOCIATED WITH MULTIDRUG-RESISTANT TUBERCULOSIS AT SIRIRAJ HOSPITAL, BANGKOK, THAILAND.                                                                               | Incorrect study population              |
| 64 | John, 2001                | Risk factors for post-transplant tuberculosis.                                                                                                                                                | Incorrect study population              |
| 65 | Kamper-Jørgensen, 2015    | Diabetes-related tuberculosis in Denmark: effect of ethnicity, diabetes duration and year of diagnosis.                                                                                       | Incorrect study population              |
| 66 | kennedy, 1933             | ACTIVE PULMONARY TUBERCULOSIS AND DIABETES MELLITUS.                                                                                                                                          | Review                                  |
| 67 | Khalil, 2016              | Study of risk factors for pulmonary tuberculosis among diabetes mellitus patients.                                                                                                            | No DM - group                           |
| 68 | Kim, 2019                 | Association between Tuberculosis, Statin Use, and Diabetes: A Propensity Score-Matched Analysis.                                                                                              | No data on TB-                          |
| 69 | Ku, 2013                  | Incidence of and risk factors for active tuberculosis in human immunodeficiency virus-infected patients in South Korea.                                                                       | Incorrect study population              |
| 70 | Kurgan, 1966              | Diabetes insipidus in the course of miliary, pulmonary tuberculosis.                                                                                                                          | No abstract and full text available     |
| 71 | Lawson, 2017              | Tuberculosis and diabetes in Nigerian patients with and without HIV.                                                                                                                          | not possible to extract data on outcome |
| 72 | Lebon, 1965               | [Diabetes mellitus and tuberculosis in Algerian Moslems].                                                                                                                                     | No abstract and full text available     |
| 73 | Lee, 2013                 | Risk factors for pulmonary tuberculosis in patients with chronic obstructive airway disease in Taiwan: a nationwide cohort study.                                                             | Incorrect study population              |
| 74 | Lee, 2010                 | High prevalence of latent tuberculosis infection in dialysis patients using the interferon-gamma release assay and tuberculin skin test.                                                      | Incorrect study design                  |
| 75 | Levin, 1959               | Diabetes insipidus associated with tuberculous meningitis.                                                                                                                                    | Case report                             |

|     |                         |                                                                                                                                                                                          |                                        |
|-----|-------------------------|------------------------------------------------------------------------------------------------------------------------------------------------------------------------------------------|----------------------------------------|
| 76  | Li, 2015                | Factors associated with primary transmission of multidrug-resistant tuberculosis compared with healthy controls in Henan Province, China.                                                | Impossible to extract data on exposure |
| 77  | Li, 2020                | Incidence of pulmonary tuberculosis in Chinese adults with type 2 diabetes: a retrospective cohort study in Shanghai.                                                                    | No DM - group                          |
| 78  | Lin, 2018               | Association of Obesity, Diabetes, and Risk of Tuberculosis: Two Population-Based Cohorts.                                                                                                | No data on TB-                         |
| 79  | Maâlej, 2009            | [Pulmonary tuberculosis and diabetes. A retrospective study of 60 patients in Tunisia].                                                                                                  | Incorrect study population             |
| 80  | Magee, 2013             | Clinical characteristics, drug resistance, and treatment outcomes among tuberculosis patients with diabetes in Peru.                                                                     | Incorrect study population             |
| 81  | Magee, 2015             | Diabetes mellitus is associated with cavities, smear grade, and multidrug-resistant tuberculosis in Georgia.                                                                             | No data on TB-                         |
| 82  | Marks, 2011             | Diabetes and tuberculosis, US National Health Interview Survey, 2000-2005.                                                                                                               | Incorrect study design                 |
| 83  | Martinez-Pulgarin, 2014 | Tuberculosis and diabetes comorbidity in a hospital of Colombia.                                                                                                                         | Comment on an article                  |
| 84  | Marton, 1969            | Clinical-pathological studies of lung resected tuberculous diabetics. I. Manifestation and clinical course of the diabetes-tuberculosis and their consequences.                          | No abstract and full text available    |
| 85  | Marton, 1969            | Clinical pathological studies of lung resected tuberculous diabetics. II. Relation between the factors of diabetes and the clinical course of tuberculosis.                              | No abstract and full text available    |
| 86  | Marzi, 1970             | Clinico-therapeutic observations on the association of diabetes and tuberculosis in adult, presenile and senile subjects.                                                                | No abstract and full text available    |
| 87  | Marzi, 1968             | Relationship between diabetes and tuberculosis in the aged.                                                                                                                              | No abstract and full text available    |
| 88  | Masztalerz, 1990        | The role of diabetes as a factor for increased risk of infection with tuberculosis.                                                                                                      | Incorrect study design                 |
| 89  | McAllister, 2020        | High tuberculosis incidence among people living with diabetes in Indonesia.                                                                                                              | Incorrect study design                 |
| 90  | Mendoza-Aguilar, 2012   | Functional state analysis of phagocytic cells of patients with type 2 diabetes and pulmonary tuberculosis.                                                                               | Incorrect study design                 |
| 91  | Mi, 2014                | Is resistance to anti-tuberculosis drugs associated with type 2 diabetes mellitus? A register review in Beijing, China.                                                                  | Incorrect study design                 |
| 92  | Min, 2005               | Risk Factors for Primary Multidrug Resistant Tuberculosis.                                                                                                                               | No abstract and full text available    |
| 93  | Montenero, 1950         | Interoccurrence between diabetes and tuberculosis.                                                                                                                                       | No abstract and full text available    |
| 94  | Morán-Mendoza, 2010     | Risk factors for developing tuberculosis: a 12-year follow-up of contacts of tuberculosis cases.                                                                                         | Incorrect study population             |
| 95  | Moualeu, 2012           | Analysis of The Impact of Diabetes on The Dynamical Transmission of Tuberculosis.                                                                                                        | Incorrect study design                 |
| 96  | Mu, 2019                | Screening for the Interaction of Diabetes Mellitus and Other Factors in Tuberculosis.                                                                                                    | Incorrect study population             |
| 97  | Muhammad, 2007          | Features of pulmonary tuberculosis in patients with diabetes mellitus: a comparative study.                                                                                              | Incorrect study population             |
| 98  | Mukhtar, 2016           | Cohort profile: The diabetes-tuberculosis treatment outcome (DITTO) study in Pakistan.                                                                                                   | Incorrect study population             |
| 99  | Nagar, 2018             | A study on prevalence of diabetes and associated risk factors among diagnosed tuberculosis patients registered under Revised National Tuberculosis Control Programme in Bhopal District. | Incorrect study population             |
| 100 | Nakamura, 2014          | Impact of underlying diabetes and presence of lung cavities on treatment outcomes in patients with pulmonary tuberculosis.                                                               | Incorrect study population             |
| 101 | Nanda, 1968             | Association of diabetes mellitus with pulmonary tuberculosis.                                                                                                                            | No abstract and full text available    |
| 102 | Nasa, 2014              | Screening adult tuberculosis patients for diabetes mellitus in Ebeye, Republic of the Marshall Islands.                                                                                  | Incorrect study design                 |

|     |                            |                                                                                                                                          |                                     |
|-----|----------------------------|------------------------------------------------------------------------------------------------------------------------------------------|-------------------------------------|
| 103 | No author listed, 1957     | TUBERCULOSIS and diabetes.                                                                                                               | No abstract and full text available |
| 104 | No author listed, 1971     | Pulmonary tuberculosis, sepsis, hematuria, uremia, diabetes and death.                                                                   | Case report                         |
| 105 | No author listed, 1974     | Tuberculosis and diabetes mellitus.                                                                                                      | No abstract and full text available |
| 106 | No author listed, 1979     | Infection and diabetes mellitus.                                                                                                         | No abstract and full text available |
| 107 | No author listed, 2010     | Evaluating the epidemiology of the tuberculosis and diabetes epidemics.                                                                  | No abstract and full text available |
| 108 | No author listed, 2013     | Screening of patients with diabetes mellitus for tuberculosis in India.                                                                  | Incorrect study population          |
| 109 | No author listed, 2013     | Screening of patients with tuberculosis for diabetes mellitus in India.                                                                  | Duplicate study                     |
| 110 | Ocal, 2009                 | Mild and severe forms of tuberculosis in diabetic and non-diabetic patients.                                                             | No data on TB-                      |
| 111 | Olmos, 1989                | Tuberculosis and diabetes mellitus: a longitudinal-retrospective study in a teaching hospital.                                           | No DM - group                       |
| 112 | Ou, 2012                   | Impact of pulmonary and extrapulmonary tuberculosis infection in kidney transplantation: a nationwide population-based study in Taiwan.  | Incorrect study population          |
| 113 | Pablo-Villamor Maria, 2014 | Screening for diabetes mellitus in patients diagnosed with pulmonary tuberculosis.                                                       | No data on TB-                      |
| 114 | Pagliari, 1966             | Aspects of the association of diabetes and tuberculosis observed in the dispensary.                                                      | No abstract and full text available |
| 115 | Pearson, 2019              | Tuberculosis and diabetes: bidirectional association in a UK primary care data set.                                                      | No DM - group, No data on TB-       |
| 116 | Perez-Navarro, 2017        | The effect size of type 2 diabetes mellitus on tuberculosis drug resistance and adverse treatment outcomes.                              | Incorrect study population          |
| 117 | Pérez-Navarro, 2015        | Type 2 diabetes mellitus and its influence in the development of multidrug resistance tuberculosis in patients from southeastern Mexico. | Incorrect study population          |
| 118 | Ponce-De-Leon, 2004        | Tuberculosis and diabetes in southern Mexico.                                                                                            | Incorrect study population          |
| 119 | Qiu, 2017                  | Incident rate and risk factors for tuberculosis among patients with type 2 diabetes: retrospective cohort study in Shanghai, China.      | No DM - group                       |
| 120 | Rajan, 2017                | Diabetes increases the risk of recent-transmission tuberculosis in household contacts in Sao Paulo, Brazil.                              | Incorrect study population          |
| 121 | Rajan, 2017                | Diabetes increases the risk of recent-transmission tuberculosis in household contacts in São Paulo, Brazil.                              | Duplicate study                     |
| 122 | Rifat, 2014                | Development of multidrug resistant tuberculosis in Bangladesh: a case-control study on risk factors.                                     | Incorrect study population          |
| 123 | Rosenman, 1996             | Occupational risk factors for developing tuberculosis.                                                                                   | Incorrect study population          |
| 124 | Ruesen, 2020               | Diabetes is associated with genotypically drug-resistant tuberculosis.                                                                   | Incorrect study population          |
| 125 | Rungruanghiranya, 2008     | Tuberculosis in Thai renal transplant recipients: a 15-year experience.                                                                  | Incorrect study population          |
| 126 | Russom, 2019               | Risk Factors of Gout in MDR-TB Patients in Eritrea: A Case-Control Study.                                                                | Incorrect study population          |
| 127 | Saktiawati, 2018           | Influence of Diabetes Mellitus on the Development of Multi Drug Resistant-Tuberculosis in Yogyakarta.                                    | Incorrect study population          |
| 128 | Salindri, 2016             | Diabetes Reduces the Rate of Sputum Culture Conversion in Patients With Newly Diagnosed Multidrug-Resistant Tuberculosis.                | Incorrect study population          |
| 129 | Sembiah, 2020              | Diabetes in tuberculosis patients: An emerging public health concern and the determinants and impact on treatment outcome.               | No data on TB-                      |

|     |                          |                                                                                                                                                                    |                                          |
|-----|--------------------------|--------------------------------------------------------------------------------------------------------------------------------------------------------------------|------------------------------------------|
| 130 | Sfirleaza, 1976          | Inter-relations between pulmonary tuberculosis and diabetes mellitus.                                                                                              | No data on TB-                           |
| 131 | Shanmuganathan, 2015     | Clinical manifestation and risk factors of tuberculosis infection in Malaysia: case study of a community clinic.                                                   | Incorrect study population               |
| 132 | Shetty, 2006             | An epidemiological evaluation of risk factors for tuberculosis in South India: a matched case control study.                                                       | No data on DM                            |
| 133 | India, 2020              | Co-existence of diabetes and TB among adults in India: a study based on National Family Health Survey data.                                                        | Not possible to collect data on exposure |
| 134 | Singh, 2016              | Association of tuberculosis and diabetes Mellitus: an analysis of 1000 consecutively admitted cases in a tertiary care hospital of North India.                    | Incorrect study population               |
| 135 | Singla, 2003             | Does diabetes predispose to the development of multidrug-resistant tuberculosis?                                                                                   | Comment on an article                    |
| 136 | Singla, 2006             | Influence of diabetes on manifestations and treatment outcome of pulmonary TB patients.                                                                            | No data on TB-                           |
| 137 | Skodric-Trifunovic, 2004 | Risk factors for developing tuberculosis.                                                                                                                          | Review                                   |
| 138 | Skodric-Trifunovic, 2004 | Analysis of patients with tuberculosis and diabetes mellitus at the Institute of Pulmonary Diseases and Tuberculosis of the Clinical Center of Serbia (2000-2002). | Article not in English or French         |
| 139 | Soh, 2019                | Diabetes and body mass index in relation to risk of active tuberculosis: a prospective population-based cohort.                                                    | No data on TB                            |
| 140 | Stosic, 2018             | Risk factors for multidrug-resistant tuberculosis among tuberculosis patients in Serbia: a case-control study.                                                     | No data on TB-                           |
| 141 | Suárez-García, 2009      | Risk factors for multidrug-resistant tuberculosis in a tuberculosis unit in Madrid, Spain.                                                                         | No data on TB-                           |
| 142 | Tanrikulu, 2008          | Risk factors for drug resistant tuberculosis in southeast Turkey.                                                                                                  | No data on TB-                           |
| 143 | Tarasov, 1975            | Association of diabetes mellitus and pulmonary tuberculosis (based on sanatorium data).                                                                            | Article not in English or in French      |
| 144 | Teng, 2019               | Increased risk of tuberculosis in oral cancer patients in an endemic area: a nationwide population-based study.                                                    | No data on DM                            |
| 145 | Tessier, 1962            | [Association of a sarcoidosis with diabetes insipidus and pulmonary tuberculosis (observation--comments)].                                                         | No abstract and full text available      |
| 146 | Viney, 2019              | Tuberculosis and diabetes mellitus: A dose-response relationship between the odds of tuberculosis and HbA1c.                                                       | Duplicate study                          |
| 147 | Viswanathan, 2014        | Effect of type II diabetes mellitus on treatment outcomes of tuberculosis.                                                                                         | Incorrect study population               |
| 148 | Weng, 2009               | Extrapulmonary tuberculosis: a study comparing diabetic and nondiabetic patients.                                                                                  | Incorrect study population               |
| 149 | Wu, 2011                 | Aerodigestive tract, lung and haematological cancers are risk factors for tuberculosis: an 8-year population-based study.                                          | Incorrect study population               |
| 150 | Yamamura, 1964           | ASSOCIATION OF PULMONARY TUBERCULOSIS AND DIABETES MELLITUS.                                                                                                       | Article not in English or in French      |
| 151 | Yang, 2018               | Regional differences in the incidence of tuberculosis among patients with newly diagnosed diabetes mellitus.                                                       | No DM - group                            |
| 152 | Young, 2012              | Increased risk of tuberculosis disease in people with diabetes mellitus: record-linkage study in a UK population.                                                  | Incorrect study population               |
| 153 | Zhang, 2009              | Tuberculosis complicated by diabetes mellitus at shanghai pulmonary hospital, china.                                                                               | Incorrect study population               |
| 154 | Zhu, 2006                | Risk factors for the development of pulmonary tuberculosis among type 2 diabetes mellitus patients.                                                                | Incorrect study population               |
