# Supplementary material for: Diabetes mellitus and tuberculosis, a systematic review and meta-analysis with sensitivity analysis for studies comparable for confounders
Source: PubMed Central journal article supplement (PMC8664214; doi:10.1371/journal.pone.0261246), 2021-12-10
Supplement: pone.0261246.s009.pdf [file pone.0261246.s009.pdf]

**S6 Table. P-value of Khi-2 and Fisher exact tests for qualitative confounding factors**

| Author, Year           | Qualitative confounding factors | Data extracted from included studies |                                                    |                               |                                                  | Results from this study |                           |            |
|------------------------|---------------------------------|--------------------------------------|----------------------------------------------------|-------------------------------|--------------------------------------------------|-------------------------|---------------------------|------------|
|                        |                                 | Total number of reference group      | Number of reference group with confounding factors | Total number of control group | Number of control group with confounding factors | P-value Khi-2 test      | P-value Fisher exact test | Status     |
| Lai, 2014              | Adenotonsillectomy              | 11366                                | 7                                                  | 45464                         | 31                                               | 0,968                   | 1,000                     | Symmetric  |
| Boillat-blanco, 2016   | Anemia                          | 530                                  | 425                                                | 491                           | 172                                              | 0,000                   | 0,000                     | Asymmetric |
| Shu, 2012              | Anemia                          | 91                                   | 64                                                 | 316                           | 240                                              | 0,342                   | 0,277                     | Symmetric  |
| Lai, 2014              | Appendectomy                    | 11366                                | 123                                                | 45464                         | 320                                              | 0,000                   | 0,000                     | Asymmetric |
| Lin, 2017              | Asbestosis                      | 22256                                | 15                                                 | 89024                         | 69                                               | 0,723                   | 0,684                     | Symmetric  |
| Swarna Nantha, 2017    | Atrial fibrillation             | 404                                  | 2                                                  | 359                           | 0                                                | 0,532                   | 0,501                     | Symmetric  |
| Lee, 2013              | Autoimmune disorders            | 49903                                | 104                                                | 49903                         | 133                                              | 0,069                   | 0,068                     | Symmetric  |
| Shu, 2012              | Autoimmune disorders            | 91                                   | 2                                                  | 316                           | 9                                                | 1,000                   | 1,000                     | Symmetric  |
| Ting, 2014             | Autoimmune disorders            | 296                                  | 34                                                 | 722                           | 106                                              | 0,214                   | 0,194                     | Symmetric  |
| Swarna Nantha, 2017    | Benign prostatic hyperplasia    | 404                                  | 0                                                  | 359                           | 7                                                | 0,015                   | 0,005                     | Asymmetric |
| Lee, 2016              | Bet nut use                     | 11260                                | 292                                                | 110782                        | 2553                                             | 0,057                   | 0,057                     | Symmetric  |
| Swarna Nantha, 2017    | Bronchial asthma                | 404                                  | 4                                                  | 359                           | 6                                                | 0,612                   | 0,529                     | Symmetric  |
| Wu, 2007               | Bronchiectasis                  | 264                                  | 5                                                  | 438                           | 8                                                | 1,000                   | 1,000                     | Symmetric  |
| Baker, 2012            | Cardiovascular disease          | 1652                                 | 356                                                | 16063                         | 881                                              | 0,000                   | 0,000                     | Asymmetric |
| Boillat-blanco, 2016   | Cardiovascular disease          | 530                                  | 44                                                 | 491                           | 74                                               | 0,001                   | 0,001                     | Asymmetric |
| Chung, 2014            | Cardiovascular disease          | 10168                                | 1692                                               | 40672                         | 5583                                             | 0,000                   | 0,000                     | Asymmetric |
| Leung, 2008            | Cardiovascular disease          | 6444                                 | 1282                                               | 35672                         | 4780                                             | 0,000                   | 0,000                     | Asymmetric |
| Swarna Nantha, 2017    | Cardiovascular disease          | 404                                  | 0                                                  | 359                           | 5                                                | 0,054                   | 0,023                     | Asymmetric |
| Jurcev-Savicevic, 2013 | Central sewage system           | 300                                  | 198                                                | 300                           | 185                                              | 0,308                   | 0,308                     | Symmetric  |
| Jurcev-Savicevic, 2013 | Central water supply            | 300                                  | 265                                                | 300                           | 245                                              | 0,030                   | 0,029                     | Asymmetric |
| Golub, 2019            | Chronic kidney disease          | 52820                                | 30                                                 | 766231                        | 418                                              | 0,907                   | 0,773                     | Symmetric  |
| Jurcev-Savicevic, 2013 | Chronic kidney disease          | 300                                  | 1                                                  | 300                           | 2                                                | 1,000                   | 1,000                     | Symmetric  |
| Lai, 2014              | Chronic kidney disease          | 11366                                | 535                                                | 45464                         | 1054                                             | 0,000                   | 0,000                     | Asymmetric |
| Lee, 2013              | Chronic kidney disease          | 49903                                | 160                                                | 49903                         | 104                                              | 0,001                   | 0,001                     | Asymmetric |
| Lee, 2014              | Chronic kidney disease          | 300                                  | 6                                                  | 300                           | 4                                                | 0,750                   | 0,752                     | Symmetric  |
| Lee, 2016              | Chronic kidney disease          | 11260                                | 40                                                 | 110782                        | 81                                               | 0,000                   | 0,000                     | Asymmetric |
| Lin, 2017              | Chronic kidney disease          | 22256                                | 657                                                | 89024                         | 1137                                             | 0,000                   | 0,000                     | Asymmetric |
| Lin, 2019              | Chronic kidney disease          | 2948                                 | 948                                                | 453                           | 57                                               | 0,000                   | 0,000                     | Asymmetric |
| Mori, 1992             | Chronic kidney disease          | 46                                   | 6                                                  | 46                            | 0                                                | 0,035                   | 0,026                     | Asymmetric |
| Pablos-Méndez, 1997    | Chronic kidney disease          | 5290                                 | 154                                                | 37366                         | 121                                              | 0,000                   | 0,000                     | Asymmetric |
| Pérez, 2006            | Chronic kidney disease          | 4915                                 | 75                                                 | 70808                         | 308                                              | 0,000                   | 0,000                     | Asymmetric |
| Shen, 2014             | Chronic kidney disease          | 5195                                 | 380                                                | 20780                         | 249                                              | 0,000                   | 0,000                     | Asymmetric |
| Swarna Nantha, 2017    | Chronic kidney disease          | 404                                  | 1                                                  | 359                           | 1                                                | 1,000                   | 1,000                     | Symmetric  |
| Ting, 2014             | Chronic kidney disease          | 296                                  | 7                                                  | 722                           | 15                                               | 0,961                   | 0,813                     | Symmetric  |

|                        |                                       |        |       |         |       |       |       |            |
|------------------------|---------------------------------------|--------|-------|---------|-------|-------|-------|------------|
| Zhussupov, 2016        | Chronic kidney disease                | 110    | 7     | 214     | 27    | 0,122 | 0,088 | Symmetric  |
| Lai, 2014              | Chronic liver disease                 | 11366  | 1901  | 45464   | 5345  | 0,000 | 0,000 | Asymmetric |
| Lin, 2017              | Chronic liver disease                 | 22256  | 1128  | 89024   | 1348  | 0,000 | 0,000 | Asymmetric |
| Shen, 2014             | Chronic liver disease                 | 5195   | 491   | 20780   | 1306  | 0,000 | 0,000 | Asymmetric |
| Swarna Nantha, 2017    | Chronic liver disease                 | 404    | 0     | 359     | 1     | 0,953 | 0,471 | Symmetric  |
| Chung, 2014            | Chronic obstructive pulmonary disease | 10168  | 5463  | 40672   | 11600 | 0,000 | 0,000 | Asymmetric |
| Lai, 2014              | Chronic obstructive pulmonary disease | 11366  | 4409  | 45464   | 7223  | 0,000 | 0,000 | Asymmetric |
| Lee, 2013              | Chronic obstructive pulmonary disease | 49903  | 3082  | 49903   | 2099  | 0,000 | 0,000 | Asymmetric |
| Leung, 2008            | Chronic obstructive pulmonary disease | 6444   | 328   | 35672   | 2104  | 0,011 | 0,011 | Asymmetric |
| Lin, 2017              | Chronic obstructive pulmonary disease | 22256  | 4534  | 89024   | 12653 | 0,000 | 0,000 | Asymmetric |
| Swarna Nantha, 2017    | Chronic obstructive pulmonary disease | 404    | 2     | 359     | 1     | 1,000 | 1,000 | Symmetric  |
| Ting, 2014             | Chronic obstructive pulmonary disease | 296    | 18    | 722     | 15    | 0,002 | 0,003 | Asymmetric |
| Jurcev-Savicevic, 2013 | Co-morbidity                          | 300    | 144   | 300     | 141   | 0,870 | 0,870 | Symmetric  |
| Shen, 2014             | Co-morbidity                          | 5195   | 1714  | 20780   | 4438  | 0,000 | 0,000 | Asymmetric |
| Zhussupov, 2016        | Currently rent home                   | 110    | 20    | 214     | 24    | 0,118 | 0,089 | Symmetric  |
| Baker, 2012            | Drinker                               | 1652   | 142   | 16063   | 1364  | 0,922 | 0,889 | Symmetric  |
| Boillat-blanco, 2016   | Drinker                               | 530    | 62    | 491     | 27    | 0,001 | 0,001 | Asymmetric |
| Buskin, 1994           | Drinker                               | 151    | 39    | 545     | 68    | 0,000 | 0,000 | Asymmetric |
| Davis, 2017            | Drinker                               | 562    | 279   | 1038    | 400   | 0,000 | 0,000 | Asymmetric |
| Haraldsdottir, 2015    | Drinker                               | 110    | 5     | 572     | 14    | 0,364 | 0,211 | Symmetric  |
| Hensel, 2016           | Drinker                               | 221    | 44    | 473     | 103   | 0,645 | 0,619 | Symmetric  |
| Jurcev-Savicevic, 2013 | Drinker                               | 300    | 130   | 300     | 140   | 0,460 | 0,460 | Symmetric  |
| Kubiak, 2019           | Drinker                               | 919    | 426   | 1113    | 70    | 0,000 | 0,000 | Asymmetric |
| Lee, 2014              | Drinker                               | 300    | 78    | 300     | 42    | 0,000 | 0,000 | Asymmetric |
| Lee, 2016              | Drinker                               | 11260  | 5514  | 110782  | 42002 | 0,000 | 0,000 | Asymmetric |
| Leegaard, 2011         | Drinker                               | 2950   | 268   | 14274   | 216   | 0,000 | 0,000 | Asymmetric |
| Leung, 2008            | Drinker                               | 6444   | 168   | 35672   | 1463  | 0,000 | 0,000 | Asymmetric |
| Lin, 2017              | Drinker                               | 22256  | 297   | 89024   | 606   | 0,000 | 0,000 | Asymmetric |
| Lin, 2017              | Drinker                               | 22256  | 525   | 89024   | 678   | 0,000 | 0,000 | Asymmetric |
| Mori, 1992             | Drinker                               | 46     | 25    | 46      | 15    | 0,058 | 0,058 | Symmetric  |
| Ndishimye, 2017        | Drinker                               | 150    | 84    | 150     | 91    | 0,482 | 0,482 | Symmetric  |
| Pablos-Méndez, 1997    | Drinker                               | 5290   | 440   | 37366   | 172   | 0,000 | 0,000 | Asymmetric |
| Pealing, 2015          | Drinker                               | 222731 | 18843 | 1218616 | 99444 | 0,000 | 0,000 | Asymmetric |
| Pérez, 2006            | Drinker                               | 4915   | 227   | 70808   | 360   | 0,000 | 0,000 | Asymmetric |
| Shimouchi, 2020        | Drinker                               | 192    | 88    | 190     | 59    | 0,004 | 0,003 | Asymmetric |
| Wang, 2013             | Drinker                               | 6382   | 414   | 6675    | 753   | 0,000 | 0,000 | Asymmetric |
| Davis, 2017            | Drug user                             | 562    | 5     | 1038    | 14    | 0,570 | 0,479 | Symmetric  |
| Jurcev-Savicevic, 2013 | Drug user                             | 300    | 15    | 300     | 7     | 0,128 | 0,127 | Symmetric  |
| Ndishimye, 2017        | Drug user                             | 150    | 7     | 150     | 10    | 0,617 | 0,619 | Symmetric  |
| Pablos-Méndez, 1997    | Drug user                             | 5290   | 183   | 37366   | 48    | 0,000 | 0,000 | Asymmetric |
| Swarna Nantha, 2017    | Dyslipidaemia                         | 404    | 272   | 359     | 169   | 0,000 | 0,000 | Asymmetric |
| Davis, 2017            | Ever injected heroin                  | 562    | 5     | 1038    | 5     | 0,512 | 0,335 | Symmetric  |

|                                |                                            |       |      |       |      |       |       |            |
|--------------------------------|--------------------------------------------|-------|------|-------|------|-------|-------|------------|
| Davis, 2017                    | Ever smoked heroin                         | 562   | 1    | 1038  | 3    | 1,000 | 1,000 | Symmetric  |
| Davis, 2017                    | Ever used marijuana                        | 562   | 26   | 1038  | 18   | 0,001 | 0,001 | Asymmetric |
| Davis, 2017                    | Ever used opium                            | 562   | 7    | 1038  | 4    | 0,095 | 0,059 | Symmetric  |
| Lee, 2014                      | Extra pulmonary lesion                     | 300   | 51   | 300   | 48   | 0,826 | 0,826 | Symmetric  |
| Hossain, 2014                  | Family history of diabete mellitus         | 50    | 20   | 50    | 30   | 0,072 | 0,071 | Symmetric  |
| Ting, 2014                     | Fibro-calcified lesions on chest radiogram | 296   | 86   | 722   | 128  | 0,000 | 0,000 | Asymmetric |
| Jurcev-Savicevic, 2013         | Food shortage                              | 300   | 12   | 300   | 26   | 0,029 | 0,028 | Asymmetric |
| Swarna Nantha, 2017            | Gout                                       | 404   | 3    | 359   | 6    | 0,395 | 0,319 | Symmetric  |
| Zhussupov, 2016                | Have children                              | 110   | 70   | 214   | 191  | 0,000 | 0,000 | Asymmetric |
| Lin, 2019                      | HDL, low                                   | 2948  | 1336 | 453   | 299  | 0,000 | 0,000 | Asymmetric |
| Ting, 2014                     | Health care worker                         | 296   | 15   | 296   | 27   | 0,078 | 0,077 | Symmetric  |
| Shu, 2012                      | Hemodialysis patients                      | 91    | 67   | 316   | 218  | 0,471 | 0,437 | Symmetric  |
| Wu, 2007                       | Hemodialysis patients                      | 264   | 3    | 438   | 7    | 0,864 | 0,750 | Symmetric  |
| Barron-HbA1c diabetes, 2018    | Hepatitis B infection, HBsAb               | 293   | 41   | 4665  | 187  | 0,000 | 0,000 | Asymmetric |
| Barron-HbA1c prediabetes, 2018 | Hepatitis B infection, HBsAb               | 293   | 41   | 4665  | 187  | 0,000 | 0,000 | Asymmetric |
| Hensel, 2016                   | Hepatitis B infection, HBsAb               | 221   | 144  | 473   | 264  | 0,025 | 0,021 | Asymmetric |
| Barron-HbA1c diabetes, 2018    | Hepatitis B infection, HBsAg               | 293   | 4    | 4665  | 13   | 0,014 | 0,015 | Asymmetric |
| Barron-HbA1c prediabetes, 2018 | Hepatitis B infection, HBsAg               | 293   | 4    | 4665  | 13   | 0,014 | 0,015 | Asymmetric |
| Chen, 2006                     | Hepatitis B infection, HBsAg               | 29    | 2    | 727   | 67   | 0,923 | 1,000 | Symmetric  |
| Hensel, 2016                   | Hepatitis B infection, HBsAg               | 221   | 5    | 473   | 13   | 0,905 | 0,803 | Symmetric  |
| Lin, 2017                      | Hepatitis B infection, HBsAg               | 22256 | 635  | 89024 | 1637 | 0,000 | 0,000 | Asymmetric |
| Swarna Nantha, 2017            | Hepatitis B infection, HBsAg               | 404   | 0    | 359   | 1    | 0,953 | 0,471 | Symmetric  |
| Barron-HbA1c diabetes, 2018    | Hepatitis C infection, Anti-HCV            | 293   | 4    | 4665  | 80   | 0,932 | 0,818 | Symmetric  |
| Barron-HbA1c prediabetes, 2018 | Hepatitis C infection, Anti-HCV            | 293   | 4    | 4665  | 80   | 0,932 | 0,818 | Symmetric  |
| Chen, 2006                     | Hepatitis C infection, Anti-HCV            | 29    | 10   | 727   | 174  | 0,281 | 0,191 | Symmetric  |
| Hensel, 2016                   | Hepatitis C infection, Anti-HCV            | 221   | 6    | 473   | 5    | 0,193 | 0,113 | Symmetric  |
| Lin, 2017                      | Hepatitis C infection, Anti-HCV            | 22256 | 396  | 89024 | 835  | 0,000 | 0,000 | Asymmetric |
| Zhussupov, 2016                | Hepatitis C infection, Anti-HCV            | 110   | 4    | 214   | 4    | 0,553 | 0,451 | Symmetric  |
| Ndishimye, 2017                | History of prior TB treatment              | 150   | 25   | 150   | 0    | 0,000 | 0,000 | Asymmetric |
| Boillat-blanco, 2016           | HIV infection                              | 530   | 166  | 491   | 74   | 0,000 | 0,000 | Asymmetric |
| Buskin, 1994                   | HIV infection                              | 151   | 4    | 545   | 3    | 0,068 | 0,043 | Asymmetric |
| Davis, 2017                    | HIV infection                              | 562   | 7    | 1038  | 1    | 0,006 | 0,004 | Asymmetric |
| Faurholt-Jepsen, 2011          | HIV infection                              | 803   | 347  | 350   | 35   | 0,000 | 0,000 | Asymmetric |
| Faurholt-Jepsen, 2014          | HIV infection                              | 187   | 83   | 190   | 17   | 0,000 | 0,000 | Asymmetric |
| Hensel, 2016                   | HIV infection                              | 221   | 4    | 473   | 6    | 0,829 | 0,733 | Symmetric  |
| Jurcev-Savicevic, 2013         | HIV infection                              | 300   | 1    | 300   | 0    | 1,000 | 1,000 | Symmetric  |
| Lee, 2013                      | HIV infection                              | 49903 | 7    | 49903 | 5    | 0,773 | 0,774 | Symmetric  |
| Leegaard, 2011                 | HIV infection                              | 2950  | 3    | 14274 | 13   | 1,000 | 0,746 | Symmetric  |
| Lin, 2017                      | HIV infection                              | 22256 | 5    | 89024 | 27   | 0,691 | 0,662 | Symmetric  |
| Pablos-Méndez, 1997            | HIV infection                              | 5290  | 912  | 37366 | 131  | 0,000 | 0,000 | Asymmetric |
| Ting, 2014                     | HIV infection                              | 296   | 0    | 722   | 0    | NA    | 1,000 | Symmetric  |
| Zhussupov, 2016                | HIV infection                              | 110   | 2    | 214   | 0    | 0,219 | 0,115 | Symmetric  |

|                                        |                           |       |       |        |       |       |       |            |
|----------------------------------------|---------------------------|-------|-------|--------|-------|-------|-------|------------|
| Boillat-blanco, 2016                   | HIV treated with cART     | 530   | 51    | 491    | 6     | 0,000 | 0,000 | Asymmetric |
| Chung, 2014                            | Hyperlipidaemia           | 10168 | 1714  | 40672  | 7126  | 0,118 | 0,118 | Symmetric  |
| Baker, 2012                            | Hypertension              | 1652  | 668   | 16063  | 1447  | 0,000 | 0,000 | Asymmetric |
| Chung, 2014                            | Hypertension              | 10168 | 3931  | 40672  | 15249 | 0,031 | 0,031 | Asymmetric |
| Leung, 2008                            | Hypertension              | 6444  | 4027  | 35672  | 13983 | 0,000 | 0,000 | Asymmetric |
| Swarna Nantha, 2017                    | Hypertension              | 404   | 335   | 359    | 343   | 0,000 | 0,000 | Asymmetric |
| Jurcev-Savicevic, 2013                 | Illicit drug use          | 300   | 3     | 300    | 1     | 0,616 | 0,624 | Symmetric  |
| Jurcev-Savicevic, 2013                 | Immunosuppressive therapy | 300   | 11    | 300    | 7     | 0,473 | 0,474 | Symmetric  |
| Swarna Nantha, 2017                    | Ischaemic heart disease   | 404   | 9     | 359    | 17    | 0,088 | 0,071 | Symmetric  |
| Lee, 2013                              | Liver cirrhosis           | 49903 | 47    | 49903  | 19    | 0,001 | 0,001 | Asymmetric |
| Lin, 2017                              | Liver cirrhosis           | 22256 | 697   | 89024  | 1149  | 0,000 | 0,000 | Asymmetric |
| Shu, 2012                              | Liver cirrhosis           | 91    | 1     | 316    | 5     | 1,000 | 1,000 | Symmetric  |
| Ting, 2014                             | Liver cirrhosis           | 296   | 11    | 722    | 33    | 0,661 | 0,614 | Symmetric  |
| Wu, 2007                               | Liver cirrhosis           | 264   | 13    | 438    | 9     | 0,059 | 0,044 | Asymmetric |
| Alisjahbana, 2006                      | Living in a crowded home  | 454   | 256   | 556    | 325   | 0,551 | 0,523 | Symmetric  |
| Baker, 2012                            | Living in a crowded home  | 1652  | 136   | 16063  | 1463  | 0,255 | 0,260 | Symmetric  |
| Jurcev-Savicevic, 2013                 | Living in a crowded home  | 300   | 139   | 300    | 94    | 0,000 | 0,000 | Asymmetric |
| Baker, 2012                            | Low income                | 1652  | 520   | 16063  | 3158  | 0,000 | 0,000 | Asymmetric |
| Baker, 2012                            | Lung disease              | 1652  | 173   | 16063  | 807   | 0,000 | 0,000 | Asymmetric |
| Alisjahbana, 2006                      | Male gender               | 454   | 238   | 556    | 292   | 1,000 | 1,000 | Symmetric  |
| Baker, 2012                            | Male gender               | 1652  | 804   | 16063  | 7991  | 0,418 | 0,408 | Symmetric  |
| Barron-HbA1c diabetes, 2018            | Male gender               | 293   | 164   | 4665   | 2206  | 0,006 | 0,005 | Asymmetric |
| Barron-HbA1c prediabetes, 2018         | Male gender               | 293   | 164   | 4665   | 2206  | 0,006 | 0,005 | Asymmetric |
| Boillat-blanco, 2016                   | Male gender               | 530   | 341   | 491    | 254   | 0,000 | 0,000 | Asymmetric |
| Chen, 2006                             | Male gender               | 29    | 21    | 727    | 422   | 0,178 | 0,177 | Symmetric  |
| Chung, 2014                            | Male gender               | 10168 | 6937  | 40672  | 27748 | 1,000 | 1,000 | Symmetric  |
| Corris-OGTT result or on insulin, 2012 | Male gender               | 166   | 88    | 15     | 7     | 0,840 | 0,789 | Symmetric  |
| Corris, 2012                           | Male gender               | 166   | 88    | 15     | 7     | 0,840 | 0,789 | Symmetric  |
| Davis, 2017                            | Male gender               | 562   | 308   | 1038   | 431   | 0,000 | 0,000 | Asymmetric |
| Faurholt-Jepsen, 2011                  | Male gender               | 803   | 497   | 350    | 193   | 0,037 | 0,036 | Asymmetric |
| Faurholt-Jepsen, 2014                  | Male gender               | 187   | 115   | 190    | 110   | 0,543 | 0,529 | Symmetric  |
| Haraldsdottir, 2015                    | Male gender               | 110   | 61    | 572    | 213   | 0,001 | 0,000 | Asymmetric |
| Hensel, 2016                           | Male gender               | 221   | 127   | 473    | 254   | 0,397 | 0,369 | Symmetric  |
| Kubiak, 2019                           | Male gender               | 919   | 729   | 1113   | 329   | 0,000 | 0,000 | Asymmetric |
| Lai, 2014                              | Male gender               | 11366 | 7535  | 45464  | 30140 | 1,000 | 1,000 | Symmetric  |
| Lee, 2013                              | Male gender               | 49903 | 26202 | 49903  | 26202 | 1,000 | 1,000 | Symmetric  |
| Lee, 2016                              | Male gender               | 11260 | 4742  | 110782 | 38801 | 0,000 | 0,000 | Asymmetric |
| Leegaard, 2011                         | Male gender               | 2950  | 1567  | 14274  | 7610  | 0,863 | 0,855 | Symmetric  |
| Leung, 2008                            | Male gender               | 6444  | 2223  | 35672  | 12378 | 0,764 | 0,765 | Symmetric  |
| Lin, 2017                              | Male gender               | 22256 | 12211 | 89024  | 48844 | 1,000 | 1,000 | Symmetric  |
| Lin, 2019                              | Male gender               | 2948  | 1468  | 453    | 109   | 0,000 | 0,000 | Asymmetric |
| Mori, 1992                             | Male gender               | 46    | 30    | 46     | 21    | 0,093 | 0,093 | Symmetric  |

|                        |                        |        |        |         |        |       |       |            |
|------------------------|------------------------|--------|--------|---------|--------|-------|-------|------------|
| Ndishimye, 2017        | Male gender            | 150    | 118    | 150     | 118    | 1,000 | 1,000 | Symmetric  |
| Pablos-Méndez, 1997    | Male gender            | 5290   | 3522   | 37366   | 21318  | 0,000 | 0,000 | Asymmetric |
| Pealing, 2015          | Male gender            | 222731 | 122594 | 1218616 | 647287 | 0,000 | 0,000 | Asymmetric |
| Pereira, 2016          | Male gender            | 323    | 197    | 323     | 196    | 1,000 | 1,000 | Symmetric  |
| Pérez, 2006            | Male gender            | 4915   | 2672   | 70808   | 34610  | 0,000 | 0,000 | Asymmetric |
| Shen, 2014             | Male gender            | 5195   | 2478   | 20780   | 9912   | 1,000 | 1,000 | Symmetric  |
| Shimouchi, 2020        | Male gender            | 192    | 179    | 190     | 182    | 0,383 | 0,370 | Symmetric  |
| Shu, 2012              | Male gender            | 91     | 55     | 316     | 162    | 0,154 | 0,152 | Symmetric  |
| Swarna Nantha, 2017    | Male gender            | 404    | 169    | 359     | 206    | 0,000 | 0,000 | Asymmetric |
| Ting, 2014             | Male gender            | 296    | 174    | 722     | 360    | 0,012 | 0,011 | Asymmetric |
| Viney, 2015            | Male gender            | 275    | 144    | 499     | 235    | 0,184 | 0,176 | Symmetric  |
| Wang, 2013             | Male gender            | 6382   | 4631   | 6675    | 3712   | 0,000 | 0,000 | Asymmetric |
| Wardhani, 2019         | Male gender            | 2259   | 874    | 31993   | 15534  | 0,000 | 0,000 | Asymmetric |
| Wu, 2007               | Male gender            | 264    | 200    | 438     | 234    | 0,000 | 0,000 | Asymmetric |
| Zhussupov, 2016        | Male gender            | 110    | 62     | 214     | 87     | 0,010 | 0,009 | Asymmetric |
| Buskin, 1994           | Malignant disease      | 151    | 6      | 545     | 6      | 0,041 | 0,027 | Asymmetric |
| Chen, 2006             | Malignant disease      | 29     | 4      | 727     | 55     | 0,383 | 0,274 | Symmetric  |
| Golub, 2019            | Malignant disease      | 52820  | 90     | 766231  | 1073   | 0,083 | 0,083 | Symmetric  |
| Jurcev-Savicevic, 2013 | Malignant disease      | 300    | 15     | 300     | 5      | 0,041 | 0,038 | Asymmetric |
| Lee, 2013              | Malignant disease      | 49903  | 1015   | 49903   | 922    | 0,035 | 0,035 | Asymmetric |
| Lee, 2014              | Malignant disease      | 300    | 36     | 300     | 24     | 0,134 | 0,134 | Symmetric  |
| Lee, 2016              | Malignant disease      | 11260  | 319    | 110782  | 1789   | 0,000 | 0,000 | Asymmetric |
| Leung, 2008            | Malignant disease      | 6444   | 38     | 35672   | 249    | 0,373 | 0,366 | Symmetric  |
| Lin, 2017              | Malignant disease      | 22256  | 625    | 89024   | 2118   | 0,000 | 0,000 | Asymmetric |
| Pérez, 2006            | Malignant disease      | 4915   | 357    | 70808   | 6203   | 0,000 | 0,000 | Asymmetric |
| Shu, 2012              | Malignant disease      | 91     | 10     | 316     | 19     | 0,163 | 0,110 | Symmetric  |
| Ting, 2014             | Malignant disease      | 296    | 106    | 722     | 245    | 0,617 | 0,611 | Symmetric  |
| Wu, 2007               | Malignant disease      | 264    | 6      | 438     | 9      | 1,000 | 1,000 | Symmetric  |
| Baker, 2012            | Marital status, Single | 1652   | 1241   | 16063   | 8889   | 0,000 | 0,000 | Asymmetric |
| Davis, 2017            | Marital status, Single | 562    | 152    | 1038    | 144    | 0,000 | 0,000 | Asymmetric |
| Faurholt-Jepsen, 2011  | Marital status, Single | 803    | 218    | 350     | 89     | 0,597 | 0,563 | Symmetric  |
| Jurcev-Savicevic, 2013 | Marital status, Single | 300    | 95     | 300     | 126    | 0,011 | 0,011 | Asymmetric |
| Kubiak, 2019           | Marital status, Single | 919    | 246    | 1113    | 411    | 0,000 | 0,000 | Asymmetric |
| Lee, 2016              | Marital status, Single | 11260  | 311    | 110782  | 5752   | 0,000 | 0,000 | Asymmetric |
| Leegaard, 2011         | Marital status, Single | 2950   | 660    | 14274   | 2705   | 0,000 | 0,000 | Asymmetric |
| Leung, 2008            | Marital status, Single | 6444   | 193    | 35672   | 1427   | 0,000 | 0,000 | Asymmetric |
| Ndishimye, 2017        | Marital status, Single | 150    | 67     | 150     | 62     | 0,641 | 0,641 | Symmetric  |
| Wang, 2013             | Marital status, Single | 6382   | 1221   | 6675    | 754    | 0,000 | 0,000 | Asymmetric |
| Pérez, 2006            | Nutrition deficit      | 4915   | 464    | 70808   | 1051   | 0,000 | 0,000 | Asymmetric |
| Ting, 2014             | Organ transplantation  | 296    | 0      | 722     | 12     | 0,056 | 0,023 | Asymmetric |
| Swarna Nantha, 2017    | Osteoarthritis         | 404    | 1      | 359     | 1      | 1,000 | 1,000 | Symmetric  |
| Jurcev-Savicevic, 2013 | Other chronic diseases | 300    | 130    | 300     | 133    | 0,869 | 0,869 | Symmetric  |

|                                        |                                        |       |       |        |        |       |       |            |
|----------------------------------------|----------------------------------------|-------|-------|--------|--------|-------|-------|------------|
| Buskin, 1994                           | Pancreatitis                           | 151   | 2     | 545    | 3      | 0,651 | 0,298 | Symmetric  |
| Buskin, 1994                           | Partial gastrectomy                    | 151   | 4     | 545    | 3      | 0,068 | 0,043 | Asymmetric |
| Ndishimye, 2017                        | Persistent cough                       | 150   | 116   | 150    | 49     | 0,000 | 0,000 | Asymmetric |
| Hossain, 2014                          | Physical activity                      | 50    | 15    | 50     | 10     | 0,356 | 0,356 | Symmetric  |
| Lai, 2014                              | Pneumoconiosis                         | 11366 | 198   | 45464  | 305    | 0,000 | 0,000 | Asymmetric |
| Lee, 2013                              | Pneumoconiosis                         | 4993  | 3     | 49903  | 1      | 0,000 | 0,003 | Asymmetric |
| Lee, 2016                              | Pneumoconiosis                         | 11260 | 103   | 110782 | 641    | 0,000 | 0,000 | Asymmetric |
| Lin, 2017                              | Pneumoconiosis                         | 22256 | 183   | 89024  | 637    | 0,105 | 0,096 | Symmetric  |
| Wu, 2007                               | Pneumoconiosis                         | 264   | 44    | 438    | 28     | 0,000 | 0,000 | Asymmetric |
| Lee, 2014                              | Poly-drug resistant                    | 300   | 9     | 300    | 4      | 0,262 | 0,262 | Symmetric  |
| Ting, 2014                             | Post gastrectomy                       | 296   | 10    | 722    | 9      | 0,043 | 0,037 | Asymmetric |
| Ndishimye, 2017                        | Presence of TB patient in household    | 150   | 16    | 150    | 4      | 0,011 | 0,009 | Asymmetric |
| Jurcev-Savicevic, 2013                 | Previous hospitalizations              | 300   | 188   | 300    | 190    | 0,933 | 0,933 | Symmetric  |
| Leung, 2008                            | Previous hospitalizations              | 6444  | 1095  | 35672  | 4744   | 0,000 | 0,000 | Asymmetric |
| Boillat-blanco, 2016                   | Previously known HIV                   | 530   | 86    | 491    | 10     | 0,000 | 0,000 | Asymmetric |
| Davis, 2017                            | Prisoners                              | 562   | 21    | 1038   | 15     | 0,006 | 0,004 | Asymmetric |
| Jurcev-Savicevic, 2013                 | Prisoners                              | 300   | 13    | 300    | 20     | 0,283 | 0,283 | Symmetric  |
| Baker, 2012                            | Receiving government subsidy           | 1652  | 474   | 16063  | 3006   | 0,000 | 0,000 | Asymmetric |
| Baker, 2012                            | Residence in an indigenous community   | 1652  | 127   | 16063  | 1176   | 0,621 | 0,586 | Symmetric  |
| Viney, 2015                            | Self-reported comorbidities            | 275   | 14    | 499    | 73     | 0,000 | 0,000 | Asymmetric |
| Kubiak, 2019                           | Self-reported history of renal failure | 919   | 1     | 1113   | 3      | 0,756 | 0,631 | Symmetric  |
| Barron-HbA1c diabetes, 2018            | Self-reported Hypertension             | 293   | 114   | 4665   | 1448   | 0,006 | 0,006 | Asymmetric |
| Barron-HbA1c prediabetes, 2018         | Self-reported Hypertension             | 293   | 114   | 4665   | 1448   | 0,006 | 0,006 | Asymmetric |
| Baker, 2012                            | Smoke Exposure                         | 1652  | 336   | 16063  | 3557   | 0,098 | 0,092 | Symmetric  |
| Barron-HbA1c diabetes, 2018            | Smoke Exposure                         | 293   | 65    | 4665   | 902    | 0,278 | 0,254 | Symmetric  |
| Barron-HbA1c prediabetes, 2018         | Smoke Exposure                         | 293   | 65    | 4665   | 902    | 0,278 | 0,254 | Symmetric  |
| Boillat-blanco, 2016                   | Smoke Exposure                         | 530   | 149   | 491    | 99     | 0,004 | 0,003 | Asymmetric |
| Buskin, 1994                           | Smoke Exposure                         | 151   | 69    | 545    | 209    | 0,124 | 0,111 | Symmetric  |
| Corris-OGTT result or on insulin, 2012 | Smoke Exposure                         | 166   | 62    | 15191  | 5742   | 0,969 | 0,936 | Symmetric  |
| Corris, 2012                           | Smoke Exposure                         | 166   | 62    | 15191  | 5742   | 0,969 | 0,936 | Symmetric  |
| Davis, 2017                            | Smoke Exposure                         | 562   | 138   | 1038   | 93     | 0,000 | 0,000 | Asymmetric |
| Golub, 2019                            | Smoke Exposure                         | 52820 | 27366 | 766231 | 411645 | 0,000 | 0,000 | Asymmetric |
| Haraldsdottir, 2015                    | Smoke Exposure                         | 110   | 9     | 572    | 30     | 0,322 | 0,259 | Symmetric  |
| Hensel, 2016                           | Smoke Exposure                         | 221   | 50    | 473    | 107    | 1,000 | 1,000 | Symmetric  |
| Jurcev-Savicevic, 2013                 | Smoke Exposure                         | 300   | 107   | 300    | 68     | 0,001 | 0,001 | Asymmetric |
| Jurcev-Savicevic, 2013                 | Smoke Exposure                         | 300   | 68    | 300    | 107    | 0,001 | 0,001 | Asymmetric |
| Kubiak, 2019                           | Smoke Exposure                         | 919   | 215   | 1113   | 107    | 0,000 | 0,000 | Asymmetric |
| Lee, 2014                              | Smoke Exposure                         | 300   | 146   | 300    | 116    | 0,017 | 0,017 | Asymmetric |
| Lee, 2016                              | Smoke Exposure                         | 11260 | 1821  | 110782 | 16280  | 0,000 | 0,000 | Asymmetric |
| Leung, 2008                            | Smoke Exposure                         | 6444  | 490   | 35672  | 3317   | 0,000 | 0,000 | Asymmetric |
| Lin, 2019                              | Smoke Exposure                         | 2948  | 433   | 453    | 31     | 0,000 | 0,000 | Asymmetric |
| Ndishimye, 2017                        | Smoke Exposure                         | 150   | 97    | 150    | 45     | 0,000 | 0,000 | Asymmetric |

|                                |                                     |        |       |         |        |       |       |            |
|--------------------------------|-------------------------------------|--------|-------|---------|--------|-------|-------|------------|
| Pealing, 2015                  | Smoke Exposure                      | 222731 | 42414 | 1218616 | 244247 | 0,000 | 0,000 | Asymmetric |
| Shimouchi, 2020                | Smoke Exposure                      | 192    | 108   | 190     | 120    | 0,203 | 0,177 | Symmetric  |
| Shu, 2012                      | Smoke Exposure                      | 91     | 8     | 316     | 16     | 0,281 | 0,206 | Symmetric  |
| Ting, 2014                     | Smoke Exposure                      | 296    | 121   | 722     | 195    | 0,000 | 0,000 | Asymmetric |
| Wang, 2013                     | Smoke Exposure                      | 6382   | 900   | 6675    | 379    | 0,000 | 0,000 | Asymmetric |
| Zhussupov, 2016                | Smoke Exposure                      | 110    | 41    | 214     | 59     | 0,096 | 0,077 | Symmetric  |
| Lee, 2016                      | Steroïde use                        | 11260  | 387   | 110782  | 2427   | 0,000 | 0,000 | Asymmetric |
| Hensel, 2016                   | Syphilis                            | 221    | 3     | 473     | 10     | 0,701 | 0,765 | Symmetric  |
| Swarna Nantha, 2017            | Thyroid disorder                    | 404    | 4     | 359     | 8      | 0,280 | 0,244 | Symmetric  |
| Barron-HbA1c diabetes, 2018    | Total Bilirubin (mg/dL), Not Normal | 293    | 2     | 4665    | 62     | 0,599 | 0,588 | Symmetric  |
| Barron-HbA1c prediabetes, 2018 | Total Bilirubin (mg/dL), Not Normal | 293    | 2     | 4665    | 62     | 0,599 | 0,588 | Symmetric  |
| Jurcev-Savicevic, 2013         | Transplantation                     | 300    | 1     | 300     | 1      | 1,000 | 1,000 | Symmetric  |
| Lee, 2013                      | Transplantation                     | 49903  | 22    | 49903   | 8      | 0,018 | 0,016 | Asymmetric |
| Baker, 2012                    | Unemployed                          | 1652   | 1090  | 16063   | 7369   | 0,000 | 0,000 | Asymmetric |
| Jurcev-Savicevic, 2013         | Unemployed                          | 300    | 22    | 300     | 70     | 0,000 | 0,000 | Asymmetric |
| Ndishimye, 2017                | Unemployed                          | 150    | 121   | 150     | 100    | 0,009 | 0,009 | Asymmetric |
| Davis, 2017                    | Used marijuana in the past 90 days  | 562    | 8     | 1038    | 4      | 0,046 | 0,031 | Asymmetric |
| Leung, 2008                    | Weight loss                         | 6444   | 251   | 35672   | 892    | 0,000 | 0,000 | Asymmetric |
| Ndishimye, 2017                | Weight loss                         | 150    | 114   | 150     | 92     | 0,009 | 0,009 | Asymmetric |
