# Supplementary material for: Diabetes mellitus and tuberculosis, a systematic review and meta-analysis with sensitivity analysis for studies comparable for confounders
Source: PubMed Central journal article supplement (PMC8664214; doi:10.1371/journal.pone.0261246), 2021-12-10
Supplement: pone.0261246.s010.pdf [file pone.0261246.s010.pdf]

**S7 Table. P-value of Student test for quantitative confounding factors**

| Author, Year          | Quantitative confounding factors | Total number of reference group | Mean for reference group | SD for reference group | Total number of control group | Mean for control group | SD for control group | P-Value for Student Test with unequal variance | Status     |
|-----------------------|----------------------------------|---------------------------------|--------------------------|------------------------|-------------------------------|------------------------|----------------------|------------------------------------------------|------------|
| Baker, 2012           | Age                              | 1652                            | 59,8                     | 13,3                   | 16063                         | 36,6                   | 18,7                 | 0,000                                          | Asymmetric |
| Boillat-blanco, 2016  | Age                              | 530                             | 35,9                     | 12,0                   | 491                           | 36,7                   | 13,0                 | 0,154                                          | Symmetric  |
| Chen, 2006            | Age                              | 29                              | 42,5                     | 15,2                   | 722                           | 40,6                   | 12,1                 | 0,256                                          | Symmetric  |
| Davis, 2017           | Age                              | 562                             | 35,4                     | 13,1                   | 1038                          | 40,8                   | 13,4                 | 0,000                                          | Asymmetric |
| Faurholt-Jepsen, 2011 | Age                              | 803                             | 34,8                     | 11,9                   | 350                           | 33,8                   | 12,0                 | 0,096                                          | Symmetric  |
| Faurholt-Jepsen, 2014 | Age                              | 187                             | 34,4                     | 12,7                   | 190                           | 34,0                   | 11,9                 | 0,376                                          | Symmetric  |
| Hensel, 2016          | Age                              | 221                             | 36,1                     | 14,2                   | 473                           | 33,1                   | 10,9                 | 0,003                                          | Asymmetric |
| Kubiak, 2019          | Age                              | 919                             | 44,9                     | 14,0                   | 1113                          | 36,8                   | 14,4                 | 0,000                                          | Asymmetric |
| Lee, 2013             | Age                              | 49903                           | 61,9                     | 14,2                   | 49903                         | 61,9                   | 14,2                 | 0,500                                          | Symmetric  |
| Leegaard, 2011        | Age                              | 2950                            | 53,4                     | 26,2                   | 14274                         | 53,6                   | 26,3                 | 0,307                                          | Symmetric  |
| Lin, 2017             | Age                              | 22256                           | 56,8                     | 13,4                   | 89024                         | 56,8                   | 13,7                 | 0,500                                          | Symmetric  |
| Lin, 2019             | Age                              | 2948                            | 61,5                     | 9,3                    | 453                           | 51,3                   | 10,5                 | 0,000                                          | Asymmetric |
| Ndishimye, 2017       | Age                              | 150                             | 43,9                     | 7,8                    | 150                           | 42,5                   | 9,3                  | 0,079                                          | Symmetric  |
| Pealing, 2015         | Age                              | 222731                          | 62,6                     | 14,8                   | 1218616                       | 63,3                   | 14,5                 | 0,000                                          | Asymmetric |
| Pereira, 2016         | Age                              | 323                             | 38,5                     | 14,2                   | 323                           | 38,5                   | 14,3                 | 0,500                                          | Symmetric  |
| Shen, 2014            | Age                              | 5195                            | 18,9                     | 10,2                   | 20780                         | 23,8                   | 9,8                  | 0,000                                          | Asymmetric |
| Shu, 2012             | Age                              | 91                              | 64,9                     | 11,0                   | 316                           | 60,0                   | 13,5                 | 0,000                                          | Asymmetric |
| Swarna Nantha, 2017   | Age                              | 404                             | 61,7                     | 9,8                    | 359                           | 63,0                   | 10,0                 | 0,035                                          | Asymmetric |
| Wang, 2013            | Age                              | 6382                            | 50,4                     | 18,6                   | 6675                          | 57,8                   | 16,4                 | 0,000                                          | Asymmetric |
| Wu, 2007              | Age                              | 264                             | 61,0                     | 19,1                   | 438                           | 55,5                   | 18,5                 | 0,000                                          | Asymmetric |
| Faurholt-Jepsen, 2014 | Alpha-1-acid glycoprotein, g/l   | 187                             | 2,6                      | 0,8                    | 190                           | 0,7                    | 0,3                  | 0,000                                          | Asymmetric |
| Alisjahbana, 2006     | Body mass index                  | 454                             | 17,3                     | 4,9                    | 556                           | 24,1                   | 4,4                  | 0,000                                          | Asymmetric |
| Baker, 2012           | Body mass index                  | 1652                            | 25,0                     | 3,5                    | 16063                         | 22,4                   | 3,6                  | 0,000                                          | Asymmetric |
| Boillat-blanco, 2016  | Body mass index                  | 530                             | 19,6                     | 4,0                    | 491                           | 25,4                   | 5,0                  | 0,000                                          | Asymmetric |
| Faurholt-Jepsen, 2011 | Body mass index                  | 803                             | 18,4                     | 2,7                    | 350                           | 22,6                   | 4,1                  | 0,000                                          | Asymmetric |
| Faurholt-Jepsen, 2014 | Body mass index                  | 187                             | 18,3                     | 2,4                    | 190                           | 22,4                   | 3,8                  | 0,000                                          | Asymmetric |
| Hensel, 2016          | Body mass index                  | 221                             | 24,0                     | 4,5                    | 473                           | 24,0                   | 4,5                  | 0,427                                          | Symmetric  |
| Wang, 2013            | Body mass index                  | 6382                            | 20,9                     | 2,8                    | 6675                          | 22,5                   | 3,0                  | 0,000                                          | Asymmetric |
| Faurholt-Jepsen, 2014 | CD4 count, cells/ ìl             | 187                             | 483,8                    | 340,4                  | 190                           | 577,5                  | 318,2                | 0,003                                          | Asymmetric |
| Davis, 2017           | Cigarettes smoked in a week      | 562                             | 14,0                     | 38,9                   | 1038                          | 12,2                   | 38,0                 | 0,192                                          | Symmetric  |

|                       |                                      |      |       |      |      |       |      |       |            |
|-----------------------|--------------------------------------|------|-------|------|------|-------|------|-------|------------|
| Chen, 2006            | Dialysis duration                    | 29   | 38,1  | 42,6 | 722  | 27,2  | 52,8 | 0,095 | Symmetric  |
| Shu, 2012             | Dialysis duration                    | 91   | 4,3   | 3,6  | 316  | 4,7   | 4,3  | 0,187 | Symmetric  |
| Wang, 2013            | Diastolic blood pressure             | 6382 | 76,7  | 7,7  | 6675 | 79,3  | 9,8  | 0,000 | Asymmetric |
| Boillat-blanco, 2016  | Hemoglobin                           | 530  | 10,8  | 2,2  | 491  | 12,9  | 1,7  | 0,000 | Asymmetric |
| Wang, 2013            | Hemoglobin                           | 6382 | 131,9 | 17,3 | 6675 | 131,1 | 43,5 | 0,077 | Symmetric  |
| Wang, 2013            | High Density Lipoprotein Cholesterol | 6382 | 1,5   | 0,6  | 6675 | 1,6   | 0,8  | 0,000 | Asymmetric |
| Faurholt-Jepsen, 2014 | Lymphocytes, cells/ ìl               | 187  | 1,8   | 0,8  | 190  | 2,1   | 0,6  | 0,000 | Asymmetric |
| Faurholt-Jepsen, 2014 | Neutrophil granulocytes, cells/ ìl   | 187  | 4,5   | 1,8  | 190  | 2,1   | 1,0  | 0,000 | Asymmetric |
| Shu, 2012             | Serum albumin, g/dL                  | 91   | 4,1   | 0,3  | 316  | 4,0   | 0,4  | 0,005 | Asymmetric |
| Wang, 2013            | Systolic blood pressure              | 6382 | 119,7 | 11,4 | 6675 | 124,0 | 15,0 | 0,000 | Asymmetric |
| Wang, 2013            | Total cholesterol                    | 6382 | 4,4   | 1,1  | 6675 | 4,7   | 1,2  | 0,000 | Asymmetric |
| Wang, 2013            | Triglyceride                         | 6382 | 1,2   | 1,1  | 6675 | 1,3   | 0,9  | 0,000 | Asymmetric |
| Kubiak, 2019          | Years of schooling                   | 919  | 6,9   | 4,7  | 1113 | 8,0   | 5,1  | 0,000 | Asymmetric |
