# Supplementary material for: Diabetes mellitus and tuberculosis, a systematic review and meta-analysis with sensitivity analysis for studies comparable for confounders
Source: PubMed Central journal article supplement (PMC8664214; doi:10.1371/journal.pone.0261246), 2021-12-10
Supplement: pone.0261246.s011.pdf [file pone.0261246.s011.pdf]

S8 Table. Subgroup analyses of the association between diabetes and tuberculosis.

|                               | <b>OR (95%CI)</b> | <b>95% Prediction interval</b> | <b>N Studies</b> | <b>N HCC cases</b> | <b>N controls</b> | <b>H (95%CI)</b> | <b>I<sup>2</sup> (95%CI)</b> | <b>P-value heterogeneity</b> | <b>P-value Egger test</b> | <b>P-value subgroup difference</b> |
|-------------------------------|-------------------|--------------------------------|------------------|--------------------|-------------------|------------------|------------------------------|------------------------------|---------------------------|------------------------------------|
| <b>Cohort studies</b>         |                   |                                |                  |                    |                   |                  |                              |                              |                           |                                    |
| <b>Country</b>                |                   |                                |                  |                    |                   |                  |                              |                              |                           | < 0.001                            |
| China                         | 1.8 [1.5-2.3]     | [0.8-4.2]                      | 7                | 147051             | 460838            | 2.6 [1.9-3.6]    | 85.4 [71.8-92.4]             | < 0.001                      | 0,043                     |                                    |
| Korean                        | 3.5 [3-4.1]       | NA                             | 1                | 8015               | 806698            | NA               | NA                           | 1                            | NA                        |                                    |
| United Kingdom                | 1.3 [1.1-1.6]     | NA                             | 1                | 222731             | 1218616           | NA               | NA                           | 1                            | NA                        |                                    |
| United States of America      | 1.8 [1.7-1.9]     | NA                             | 1                | 52820              | 766231            | NA               | NA                           | 1                            | NA                        |                                    |
| <b>UNSD Region</b>            |                   |                                |                  |                    |                   |                  |                              |                              |                           | 0,002                              |
| Eastern Asia                  | 2 [1.6-2.7]       | [0.8-5.3]                      | 8                | 155066             | 1267536           | 4.5 [3.6-5.7]    | 95.1 [92.4-96.9]             | < 0.001                      | 0,073                     |                                    |
| Northern America              | 1.8 [1.7-1.9]     | NA                             | 1                | 52820              | 766231            | NA               | NA                           | 1                            | NA                        |                                    |
| Northern Europe               | 1.3 [1.1-1.6]     | NA                             | 1                | 222731             | 1218616           | NA               | NA                           | 1                            | NA                        |                                    |
| <b>Country income level</b>   |                   |                                |                  |                    |                   |                  |                              |                              |                           | 0,029                              |
| High-income economies         | 2.1 [1.6-2.7]     | [0.8-5.4]                      | 8                | 359316             | 3009135           | 4.3 [3.5-5.5]    | 94.7 [91.6-96.6]             | < 0.001                      | 0,491                     |                                    |
| Upper-middle-income economies | 1.5 [1.4-1.6]     | NA                             | 2                | 71301              | 243248            | 1.6 [1-3.3]      | 61.5 [0-91.1]                | 0,107                        | NA                        |                                    |
| <b>TB stage</b>               |                   |                                |                  |                    |                   |                  |                              |                              |                           | 0,162                              |
| Active tuberculosis           | 1.9 [1.5-2.4]     | [0.8-4.5]                      | 9                | 427669             | 3251930           | 4.4 [3.5-5.4]    | 94.8 [92-96.6]               | < 0.001                      | 0,452                     |                                    |
| Latent tuberculosis infection | 2.5 [1.8-3.4]     | NA                             | 1                | 2948               | 453               | NA               | NA                           | 1                            | NA                        |                                    |
| <b>Controls</b>               |                   |                                |                  |                    |                   |                  |                              |                              |                           | 0,014                              |
| Non-DM                        | 2 [1.6-2.5]       | [0.8-4.8]                      | 9                | 381572             | 3098159           | 4.1 [3.3-5.2]    | 94.2 [91-96.2]               | < 0.001                      | 0,471                     |                                    |
| Presumed healthy controls     | 1.4 [1.3-1.6]     | NA                             | 1                | 49045              | 154224            | NA               | NA                           | 1                            | NA                        |                                    |
| <b>Case control studies</b>   |                   |                                |                  |                    |                   |                  |                              |                              |                           |                                    |
| <b>Country</b>                |                   |                                |                  |                    |                   |                  |                              |                              |                           | < 0.001                            |
| Bangladesh                    | 3 [0.7-12]        | NA                             | 1                | 50                 | 50                | NA               | NA                           | 1                            | NA                        |                                    |
| Brazil                        | 2.7 [1.5-4.7]     | NA                             | 1                | 323                | 323               | NA               | NA                           | 1                            | NA                        |                                    |

|                                 | <b>OR (95%CI)</b> | <b>95% Prediction interval</b> | <b>N Studies</b> | <b>N HCC cases</b> | <b>N controls</b> | <b>H (95%CI)</b> | <b>I<sup>2</sup> (95%CI)</b> | <b>P-value heterogeneity</b> | <b>P-value Egger test</b> | <b>P-value subgroup difference</b> |
|---------------------------------|-------------------|--------------------------------|------------------|--------------------|-------------------|------------------|------------------------------|------------------------------|---------------------------|------------------------------------|
| China                           | 1.6 [1.5-1.6]     | [1.2-2]                        | 3                | 21834              | 86436             | 1 [1-2]          | 0 [0-76.2]                   | 0,646                        | 0,775                     |                                    |
| Croatia                         | 1.9 [1-3.5]       | NA                             | 1                | 300                | 300               | NA               | NA                           | 1                            | NA                        |                                    |
| Denmark                         | 1.4 [1.2-1.7]     | NA                             | 1                | 2950               | 14247             | NA               | NA                           | 1                            | NA                        |                                    |
| Guinea-Bissau                   | 1.4 [0.4-5.2]     | NA                             | 1                | 110                | 572               | NA               | NA                           | 1                            | NA                        |                                    |
| India                           | 4.4 [1.4-13.3]    | NA                             | 1                | 46                 | 46                | NA               | NA                           | 1                            | NA                        |                                    |
| Indonesia                       | 4.6 [2.6-7.8]     | NA                             | 1                | 454                | 556               | NA               | NA                           | 1                            | NA                        |                                    |
| Japan                           | 1.2 [0.7-1.9]     | NA                             | 1                | 192                | 190               | NA               | NA                           | 1                            | NA                        |                                    |
| Kazakhstan                      | 9.3 [4.8-17.9]    | NA                             | 2                | 672                | 1252              | 1 NA             | 0 NA                         | 0,732                        | NA                        |                                    |
| Kiribati – Republic of Kiribati | 2.5 [1.8-3.5]     | NA                             | 1                | 275                | 499               | NA               | NA                           | 1                            | NA                        |                                    |
| Romania                         | 3.3 [1.4-8.1]     | NA                             | 1                | 150                | 150               | NA               | NA                           | 1                            | NA                        |                                    |
| Tanzania                        | 3 [1.7-5.3]       | NA                             | 2                | 1333               | 841               | 3.1 [1.6-5.9]    | 89.4 [60.5-97.2]             | 0,002                        | NA                        |                                    |
| United Kingdom                  | 2.7 [1.7-4.1]     | NA                             | 1                | 497                | 1966              | NA               | NA                           | 1                            | NA                        |                                    |
| United States of America        | 2.4 [1.8-3.1]     | [0.9-6.4]                      | 5                | 10908              | 162510            | 3.3 [2.3-4.7]    | 90.9 [81.7-95.5]             | < 0.001                      | 0,826                     |                                    |
| <b>UNSD Region</b>              |                   |                                |                  |                    |                   |                  |                              |                              |                           | < 0.001                            |
| Central Asia                    | 9.3 [4.8-17.9]    | NA                             | 2                | 672                | 1252              | 1 NA             | 0 NA                         | 0,732                        | NA                        |                                    |
| Eastern Africa                  | 3 [1.7-5.3]       | NA                             | 2                | 1333               | 841               | 3.1 [1.6-5.9]    | 89.4 [60.5-97.2]             | 0,002                        | NA                        |                                    |
| Eastern Asia                    | 1.6 [1.5-1.6]     | [1.5-1.7]                      | 4                | 22026              | 86626             | 1 [1-2.3]        | 0 [0-80.7]                   | 0,498                        | 0,502                     |                                    |
| Eastern Europe                  | 3.3 [1.4-8.1]     | NA                             | 1                | 150                | 150               | NA               | NA                           | 1                            | NA                        |                                    |
| Northern America                | 2.4 [1.8-3.1]     | [0.9-6.4]                      | 5                | 10908              | 162510            | 3.3 [2.3-4.7]    | 90.9 [81.7-95.5]             | < 0.001                      | 0,826                     |                                    |
| Northern Europe                 | 1.8 [1.2-2.8]     | NA                             | 2                | 3447               | 16213             | 2.6 [1.3-5.3]    | 85.6 [41.9-96.4]             | 0,008                        | NA                        |                                    |
| Oceania                         | 2.5 [1.8-3.5]     | NA                             | 1                | 275                | 499               | NA               | NA                           | 1                            | NA                        |                                    |
| South America                   | 2.7 [1.5-4.7]     | NA                             | 1                | 323                | 323               | NA               | NA                           | 1                            | NA                        |                                    |
| Southeastern Asia               | 4.6 [2.6-7.8]     | NA                             | 1                | 454                | 556               | NA               | NA                           | 1                            | NA                        |                                    |
| Southern Asia                   | 3.8 [1.6-9]       | NA                             | 2                | 96                 | 96                | 1 NA             | 0 NA                         | 0,674                        | NA                        |                                    |
| Southern Europe                 | 1.9 [1-3.5]       | NA                             | 1                | 300                | 300               | NA               | NA                           | 1                            | NA                        |                                    |
| West Africa                     | 1.4 [0.4-5.2]     | NA                             | 1                | 110                | 572               | NA               | NA                           | 1                            | NA                        |                                    |

|                                | <b>OR (95%CI)</b> | <b>95% Prediction interval</b> | <b>N Studies</b> | <b>N HCC cases</b> | <b>N controls</b> | <b>H (95%CI)</b> | <b>I<sup>2</sup> (95%CI)</b> | <b>P-value heterogeneity</b> | <b>P-value Egger test</b> | <b>P-value subgroup difference</b> |
|--------------------------------|-------------------|--------------------------------|------------------|--------------------|-------------------|------------------|------------------------------|------------------------------|---------------------------|------------------------------------|
| <b>Country income level</b>    |                   |                                |                  |                    |                   |                  |                              |                              |                           | 0,049                              |
| High-income economies          | 1.9 [1.6-2.4]     | [1-3.9]                        | 11               | 25299              | 205144            | 4.6 [3.8-5.5]    | 95.3 [93.1-96.7]             | < 0.001                      | 0,683                     |                                    |
| Low-income economies           | 1.4 [0.4-5.2]     | NA                             | 1                | 110                | 572               | NA               | NA                           | 1                            | NA                        |                                    |
| Lower-middle-income economies  | 2.9 [2.1-4.1]     | [1-8.2]                        | 5                | 1704               | 1436              | 1.7 [1-2.7]      | 63.5 [3.6-86.2]              | 0,027                        | 0,973                     |                                    |
| Upper-middle-income economies  | 3.6 [2.1-5.9]     | [0.7-18.7]                     | 6                | 12981              | 62786             | 3.1 [2.3-4.3]    | 89.7 [80.4-94.6]             | < 0.001                      | 0,006                     |                                    |
| <b>TB stage</b>                |                   |                                |                  |                    |                   |                  |                              |                              |                           | 0,81                               |
| Active tuberculosis            | 2.4 [1.9-2.9]     | [1-5.7]                        | 22               | 39819              | 269439            | 3.9 [3.3-4.4]    | 93.3 [91.1-94.9]             | < 0.001                      | 0,108                     |                                    |
| Latent tuberculosis infection  | 2.5 [1.8-3.5]     | NA                             | 1                | 275                | 499               | NA               | NA                           | 1                            | NA                        |                                    |
| <b>Controls</b>                |                   |                                |                  |                    |                   |                  |                              |                              |                           | 0,208                              |
| Non-TB diseases                | 2.1 [1.8-2.6]     | [1.1-4]                        | 14               | 26474              | 185479            | 4 [3.3-4.7]      | 93.6 [90.9-95.5]             | < 0.001                      | 0,428                     |                                    |
| Presumed healthy controls      | 2.9 [1.9-4.4]     | [0.7-12]                       | 9                | 13620              | 84459             | 3.2 [2.5-4.1]    | 90.1 [83.5-94.1]             | < 0.001                      | 0,024                     |                                    |
| <b>Cross sectional studies</b> |                   |                                |                  |                    |                   |                  |                              |                              |                           |                                    |
| <b>Country</b>                 |                   |                                |                  |                    |                   |                  |                              |                              |                           | < 0.001                            |
| China                          | 2.2 [1.4-3.5]     | [0.5-10]                       | 6                | 8714               | 24941             | 3.5 [2.6-4.8]    | 91.9 [85.2-95.6]             | < 0.001                      | 0,078                     |                                    |
| India                          | 7.2 [5.4-9.5]     | NA                             | 1                | 919                | 1113              | NA               | NA                           | 1                            | NA                        |                                    |
| Indonesia                      | 3.9 [2.5-6]       | NA                             | 1                | 2260               | 31998             | NA               | NA                           | 1                            | NA                        |                                    |
| Malaysia                       | 1 [0.7-1.3]       | NA                             | 1                | 404                | 359               | NA               | NA                           | 1                            | NA                        |                                    |
| Tanzania                       | 1.9 [1.1-3.2]     | NA                             | 1                | 187                | 190               | NA               | NA                           | 1                            | NA                        |                                    |
| Thailand                       | 1.6 [0.3-9.2]     | NA                             | 1                | 36                 | 114               | NA               | NA                           | 1                            | NA                        |                                    |
| United States of America       | 2.8 [1.6-4.7]     | [0.3-22.3]                     | 5                | 20529              | 15809             | 5.2 [4-6.8]      | 96.3 [93.7-97.8]             | < 0.001                      | 0,104                     |                                    |
| <b>UNSD Region</b>             |                   |                                |                  |                    |                   |                  |                              |                              |                           | < 0.001                            |
| Eastern Africa                 | 1.9 [1.1-3.2]     | NA                             | 1                | 187                | 190               | NA               | NA                           | 1                            | NA                        |                                    |
| Eastern Asia                   | 2.2 [1.4-3.5]     | [0.5-10]                       | 6                | 8714               | 24941             | 3.5 [2.6-4.8]    | 91.9 [85.2-95.6]             | < 0.001                      | 0,078                     |                                    |
| Northern America               | 2.8 [1.6-4.7]     | [0.3-22.3]                     | 5                | 20529              | 15809             | 5.2 [4-6.8]      | 96.3 [93.7-97.8]             | < 0.001                      | 0,104                     |                                    |
| Southeastern Asia              | 1.8 [0.8-4.2]     | [0-22704.1]                    | 3                | 2700               | 32471             | 3.6 [2.2-5.6]    | 92.1 [80-96.9]               | < 0.001                      | 0,607                     |                                    |
| Southern Asia                  | 7.2 [5.4-9.5]     | NA                             | 1                | 919                | 1113              | NA               | NA                           | 1                            | NA                        |                                    |

|                               | <b>OR (95%CI)</b> | <b>95% Prediction interval</b> | <b>N Studies</b> | <b>N HCC cases</b> | <b>N controls</b> | <b>H (95%CI)</b> | <b>I<sup>2</sup> (95%CI)</b> | <b>P-value heterogeneity</b> | <b>P-value Egger test</b> | <b>P-value subgroup difference</b> |
|-------------------------------|-------------------|--------------------------------|------------------|--------------------|-------------------|------------------|------------------------------|------------------------------|---------------------------|------------------------------------|
| <b>Country income level</b>   |                   |                                |                  |                    |                   |                  |                              |                              |                           | 0,28                               |
| High-income economies         | 2.9 [1.9-4.4]     | [0.7-12.4]                     | 7                | 22210              | 32599             | 4.3 [3.3-5.5]    | 94.6 [91.1-96.7]             | < 0.001                      | 0,107                     |                                    |
| Lower-middle-income economies | 3.9 [1.5-9.6]     | NA                             | 2                | 1106               | 1303              | 4.3 [2.5-7.6]    | 94.7 [83.8-98.3]             | < 0.001                      | NA                        |                                    |
| Upper-middle-income economies | 1.9 [1.2-3]       | [0.4-9.2]                      | 7                | 9733               | 40622             | 3.6 [2.7-4.7]    | 92.3 [86.6-95.5]             | < 0.001                      | 0,156                     |                                    |
| <b>TB stage</b>               |                   |                                |                  |                    |                   |                  |                              |                              |                           | 0,738                              |
| Active tuberculosis           | 2.6 [1.7-4.1]     | [0.6-11.9]                     | 8                | 29549              | 61575             | 5 [4-6.1]        | 95.9 [93.8-97.3]             | < 0.001                      | 0,109                     |                                    |
| Latent tuberculosis infection | 2.4 [1.5-3.8]     | [0.4-12.9]                     | 8                | 3500               | 12949             | 4 [3.1-5]        | 93.6 [89.7-96.1]             | < 0.001                      | 0,833                     |                                    |
| <b>Controls</b>               |                   |                                |                  |                    |                   |                  |                              |                              |                           | 0,382                              |
| Non-DM                        | 1.9 [1.1-3.3]     | [0.1-25.8]                     | 4                | 20703              | 25164             | 4.7 [3.4-6.5]    | 95.5 [91.4-97.7]             | < 0.001                      | 0,52                      |                                    |
| Non-TB diseases               | 2.6 [1.6-4]       | [0.5-12.8]                     | 8                | 10940              | 47505             | 4.6 [3.7-5.7]    | 95.3 [92.7-97]               | < 0.001                      | 0,053                     |                                    |
| Presumed healthy controls     | 3.4 [1.9-6.2]     | [0.3-43.3]                     | 4                | 1406               | 1855              | 2.8 [1.8-4.4]    | 87.6 [70.6-94.8]             | < 0.001                      | 0,254                     |                                    |
