# Supplementary material for: Diabetes mellitus and tuberculosis, a systematic review and meta-analysis with sensitivity analysis for studies comparable for confounders
Source: PLoS One. 2021 Dec 10;16(12):e0261246. doi: 10.1371/journal.pone.0261246 (PMC8664214; doi:10.1371/journal.pone.0261246)
Supplement: S5 Table — (PDF) [file pone.0261246.s008.pdf]

55 Table. Risk of bias assessment

| Author, Year                | Study Design    | Were the DM+ and DM- groups similar and recruited from the same population? | Were the DM measured similarly to both DM+ and DM- groups? | Was the DM measured in a valid and reliable way? | Were confounding factors identified? | Were strategies to deal with confounding factors stated? | Were the DM+ and DM- free of the TB at the start of the study (or at the moment of DM)? | Were the TB measured in a valid and reliable way? | Was the follow up complete, and if not, were the reasons to loss to follow up described and explored? | Were strategies to address incomplete follow up utilized? | Was appropriate statistical analysis used? | Were the TB+ and TB- groups comparable other than presence of TB in cases or absence of TB in controls? | Were TB+ and TB- matched appropriately? | Were the same criteria used for identification of TB+ and TB-? | Was DM measured in a standard, valid and reliable way? | Was DM measured in the same way for TB+ and TB-? | Were confounding factors identified? | Were strategies to deal with confounding factors stated? | Were TB assessed in a standard, valid and reliable way for TB+ and TB-? | Was the DM period of interest long enough to be meaningful? | Was appropriate statistical analysis used? | Were the criteria for inclusion in the sample clearly defined? | Were the study subjects and the setting described in detail? | Was the DM measured in a valid and reliable way? | Were objective, standard criteria used for measurement of the condition? | Were confounding factors identified? | Were strategies to deal with confounding factors stated? | Were the TB measured in a valid and reliable way? | Was appropriate statistical analysis used? | Risk of bias     |                       |                       |
|-----------------------------|-----------------|-----------------------------------------------------------------------------|------------------------------------------------------------|--------------------------------------------------|--------------------------------------|----------------------------------------------------------|-----------------------------------------------------------------------------------------|---------------------------------------------------|-------------------------------------------------------------------------------------------------------|-----------------------------------------------------------|--------------------------------------------|---------------------------------------------------------------------------------------------------------|-----------------------------------------|----------------------------------------------------------------|--------------------------------------------------------|--------------------------------------------------|--------------------------------------|----------------------------------------------------------|-------------------------------------------------------------------------|-------------------------------------------------------------|--------------------------------------------|----------------------------------------------------------------|--------------------------------------------------------------|--------------------------------------------------|--------------------------------------------------------------------------|--------------------------------------|----------------------------------------------------------|---------------------------------------------------|--------------------------------------------|------------------|-----------------------|-----------------------|
| Alshabana, 2006             | Cases control   |                                                                             |                                                            |                                                  |                                      |                                                          |                                                                                         |                                                   |                                                                                                       |                                                           |                                            | Yes                                                                                                     | Yes                                     | Yes                                                            | Yes                                                    | Yes                                              | Yes                                  | Yes                                                      | Yes                                                                     | Yes                                                         | Yes                                        |                                                                |                                                              |                                                  |                                                                          |                                      |                                                          |                                                   |                                            | Low risk of bias |                       |                       |
| Bakula-Marco, 2016          | Cases control   |                                                                             |                                                            |                                                  |                                      |                                                          |                                                                                         |                                                   |                                                                                                       |                                                           |                                            | Yes                                                                                                     | Yes                                     | Yes                                                            | Yes                                                    | Yes                                              | Yes                                  | Yes                                                      | Yes                                                                     | Yes                                                         | No                                         | Yes                                                            |                                                              |                                                  |                                                                          |                                      |                                                          |                                                   |                                            |                  | Low risk of bias      |                       |
| Banquet, 2006               | Cases control   |                                                                             |                                                            |                                                  |                                      |                                                          |                                                                                         |                                                   |                                                                                                       |                                                           |                                            | Yes                                                                                                     | Yes                                     | Yes                                                            | Yes                                                    | Yes                                              | Yes                                  | Yes                                                      | Yes                                                                     | Yes                                                         | Yes                                        | Yes                                                            |                                                              |                                                  |                                                                          |                                      |                                                          |                                                   |                                            |                  | Low risk of bias      |                       |
| Buglin, 1994                | Cases control   |                                                                             |                                                            |                                                  |                                      |                                                          |                                                                                         |                                                   |                                                                                                       |                                                           |                                            | No                                                                                                      | No                                      | Yes                                                            | Unclear                                                | Unclear                                          | Yes                                  | Yes                                                      | No                                                                      | Unclear                                                     | Yes                                        |                                                                |                                                              |                                                  |                                                                          |                                      |                                                          |                                                   |                                            |                  | High risk of bias     |                       |
| Chen, 2014                  | Cases control   |                                                                             |                                                            |                                                  |                                      |                                                          |                                                                                         |                                                   |                                                                                                       |                                                           |                                            | Yes                                                                                                     | Yes                                     | Yes                                                            | Yes                                                    | Yes                                              | Yes                                  | Yes                                                      | Yes                                                                     | Yes                                                         | Yes                                        | Yes                                                            |                                                              |                                                  |                                                                          |                                      |                                                          |                                                   |                                            |                  | Low risk of bias      |                       |
| Coria, 2012                 | Cases control   |                                                                             |                                                            |                                                  |                                      |                                                          |                                                                                         |                                                   |                                                                                                       |                                                           |                                            | No                                                                                                      | No                                      | Yes                                                            | Yes                                                    | No                                               | Yes                                  | Yes                                                      | Yes                                                                     | Unclear                                                     | Yes                                        |                                                                |                                                              |                                                  |                                                                          |                                      |                                                          |                                                   |                                            |                  | Moderate risk of bias |                       |
| Davis, 2017                 | Cases control   |                                                                             |                                                            |                                                  |                                      |                                                          |                                                                                         |                                                   |                                                                                                       |                                                           |                                            | Yes                                                                                                     | No                                      | Yes                                                            | Yes                                                    | Yes                                              | Yes                                  | Yes                                                      | Yes                                                                     | Unclear                                                     | Yes                                        |                                                                |                                                              |                                                  |                                                                          |                                      |                                                          |                                                   |                                            |                  | Low risk of bias      |                       |
| Faulstich-Jackson, 2011     | Cases control   |                                                                             |                                                            |                                                  |                                      |                                                          |                                                                                         |                                                   |                                                                                                       |                                                           |                                            | Yes                                                                                                     | Yes                                     | Yes                                                            | No                                                     | Yes                                              | Yes                                  | Yes                                                      | Yes                                                                     | Unclear                                                     | Yes                                        |                                                                |                                                              |                                                  |                                                                          |                                      |                                                          |                                                   |                                            |                  | Low risk of bias      |                       |
| Hargrett-Keil, 2016         | Cases control   |                                                                             |                                                            |                                                  |                                      |                                                          |                                                                                         |                                                   |                                                                                                       |                                                           |                                            | No                                                                                                      | No                                      | No                                                             | Yes                                                    | Yes                                              | Yes                                  | Yes                                                      | Yes                                                                     | Yes                                                         | Yes                                        | Yes                                                            |                                                              |                                                  |                                                                          |                                      |                                                          |                                                   |                                            |                  | Moderate risk of bias |                       |
| Hickman, 2014               | Cases control   |                                                                             |                                                            |                                                  |                                      |                                                          |                                                                                         |                                                   |                                                                                                       |                                                           |                                            | No                                                                                                      | No                                      | Yes                                                            | Yes                                                    | Yes                                              | Yes                                  | Yes                                                      | Yes                                                                     | Yes                                                         | No                                         | Yes                                                            |                                                              |                                                  |                                                                          |                                      |                                                          |                                                   |                                            |                  | High risk of bias     |                       |
| Jak, 2006                   | Cases control   |                                                                             |                                                            |                                                  |                                      |                                                          |                                                                                         |                                                   |                                                                                                       |                                                           |                                            | Yes                                                                                                     | Yes                                     | Yes                                                            | Yes                                                    | Yes                                              | Yes                                  | Yes                                                      | Yes                                                                     | Yes                                                         | Yes                                        | Yes                                                            |                                                              |                                                  |                                                                          |                                      |                                                          |                                                   |                                            |                  | Low risk of bias      |                       |
| Janez-Savolovic, 2013       | Cases control   |                                                                             |                                                            |                                                  |                                      |                                                          |                                                                                         |                                                   |                                                                                                       |                                                           |                                            | Yes                                                                                                     | Yes                                     | Yes                                                            | No                                                     | Unclear                                          | Yes                                  | Yes                                                      | Yes                                                                     | Yes                                                         | Yes                                        | Yes                                                            |                                                              |                                                  |                                                                          |                                      |                                                          |                                                   |                                            |                  | Low risk of bias      |                       |
| Lee, 2014                   | Cases control   |                                                                             |                                                            |                                                  |                                      |                                                          |                                                                                         |                                                   |                                                                                                       |                                                           |                                            | Yes                                                                                                     | Yes                                     | Yes                                                            | Yes                                                    | Yes                                              | Yes                                  | Yes                                                      | Yes                                                                     | Yes                                                         | Yes                                        | Yes                                                            |                                                              |                                                  |                                                                          |                                      |                                                          |                                                   |                                            |                  | Low risk of bias      |                       |
| Lee, 2013                   | Cases control   |                                                                             |                                                            |                                                  |                                      |                                                          |                                                                                         |                                                   |                                                                                                       |                                                           |                                            | No                                                                                                      | No                                      | Yes                                                            | Yes                                                    | Yes                                              | Yes                                  | Yes                                                      | Yes                                                                     | Yes                                                         | Yes                                        | Yes                                                            |                                                              |                                                  |                                                                          |                                      |                                                          |                                                   |                                            |                  | Low risk of bias      |                       |
| Legrand, 2011               | Cases control   |                                                                             |                                                            |                                                  |                                      |                                                          |                                                                                         |                                                   |                                                                                                       |                                                           |                                            | Yes                                                                                                     | Yes                                     | Yes                                                            | Yes                                                    | Yes                                              | Yes                                  | Yes                                                      | Yes                                                                     | Yes                                                         | Yes                                        | Yes                                                            |                                                              |                                                  |                                                                          |                                      |                                                          |                                                   |                                            |                  | Low risk of bias      |                       |
| Mac, 1992                   | Cases control   |                                                                             |                                                            |                                                  |                                      |                                                          |                                                                                         |                                                   |                                                                                                       |                                                           |                                            | No                                                                                                      | No                                      | Yes                                                            | Yes                                                    | Yes                                              | Yes                                  | Yes                                                      | Yes                                                                     | Unclear                                                     | Yes                                        |                                                                |                                                              |                                                  |                                                                          |                                      |                                                          |                                                   |                                            |                  | Moderate risk of bias |                       |
| Nadimane, 2017              | Cases control   |                                                                             |                                                            |                                                  |                                      |                                                          |                                                                                         |                                                   |                                                                                                       |                                                           |                                            | Yes                                                                                                     | Yes                                     | No                                                             | Yes                                                    | No                                               | No                                   | Unclear                                                  | Yes                                                                     | Unclear                                                     | Yes                                        |                                                                |                                                              |                                                  |                                                                          |                                      |                                                          |                                                   |                                            |                  | High risk of bias     |                       |
| Pelaez-Mendez, 1997         | Cases control   |                                                                             |                                                            |                                                  |                                      |                                                          |                                                                                         |                                                   |                                                                                                       |                                                           |                                            | No                                                                                                      | No                                      | Yes                                                            | Yes                                                    | No                                               | No                                   | Yes                                                      | Unclear                                                                 | No                                                          |                                            |                                                                |                                                              |                                                  |                                                                          |                                      |                                                          |                                                   |                                            |                  | High risk of bias     |                       |
| Pimenta, 2016               | Cases control   |                                                                             |                                                            |                                                  |                                      |                                                          |                                                                                         |                                                   |                                                                                                       |                                                           |                                            | No                                                                                                      | Yes                                     | Yes                                                            | Yes                                                    | Yes                                              | Yes                                  | No                                                       | Yes                                                                     | Unclear                                                     | Yes                                        |                                                                |                                                              |                                                  |                                                                          |                                      |                                                          |                                                   |                                            |                  | Low risk of bias      |                       |
| Pine, 2006                  | Cases control   |                                                                             |                                                            |                                                  |                                      |                                                          |                                                                                         |                                                   |                                                                                                       |                                                           |                                            | No                                                                                                      | No                                      | Yes                                                            | Yes                                                    | No                                               | No                                   | Unclear                                                  | Yes                                                                     | Unclear                                                     | Yes                                        |                                                                |                                                              |                                                  |                                                                          |                                      |                                                          |                                                   |                                            |                  | High risk of bias     |                       |
| Simmons, 2020               | Cases control   |                                                                             |                                                            |                                                  |                                      |                                                          |                                                                                         |                                                   |                                                                                                       |                                                           |                                            | Yes                                                                                                     | No                                      | Yes                                                            | Yes                                                    | Yes                                              | Yes                                  | Yes                                                      | Yes                                                                     | Unclear                                                     | Yes                                        |                                                                |                                                              |                                                  |                                                                          |                                      |                                                          |                                                   |                                            |                  | Low risk of bias      |                       |
| Wang, 2015                  | Cases control   |                                                                             |                                                            |                                                  |                                      |                                                          |                                                                                         |                                                   |                                                                                                       |                                                           |                                            | No                                                                                                      | No                                      | Yes                                                            | Yes                                                    | Yes                                              | Yes                                  | Yes                                                      | Yes                                                                     | Unclear                                                     | Yes                                        |                                                                |                                                              |                                                  |                                                                          |                                      |                                                          |                                                   |                                            |                  | Moderate risk of bias |                       |
| Zhusupov, 2016              | Cases control   |                                                                             |                                                            |                                                  |                                      |                                                          |                                                                                         |                                                   |                                                                                                       |                                                           |                                            | Yes                                                                                                     | Yes                                     | No                                                             | No                                                     | No                                               | Yes                                  | Yes                                                      | Yes                                                                     | Unclear                                                     | Yes                                        |                                                                |                                                              |                                                  |                                                                          |                                      |                                                          |                                                   |                                            |                  | Moderate risk of bias |                       |
| Gada, 2019                  | Cohort          | Yes                                                                         | Yes                                                        | Yes                                              | Yes                                  | Yes                                                      | Yes                                                                                     | Yes                                               | Yes                                                                                                   | Yes                                                       | Not applicable                             | Yes                                                                                                     |                                         |                                                                | No                                                     | No                                               | Yes                                  | Yes                                                      | Yes                                                                     | Unclear                                                     | Yes                                        |                                                                |                                                              |                                                  |                                                                          |                                      |                                                          |                                                   |                                            |                  |                       | Low risk of bias      |
| Kim, 1995                   | Cohort          | Unclear                                                                     | Yes                                                        | Yes                                              | Yes                                  | No                                                       | Not applicable                                                                          | Unclear                                           | Yes                                                                                                   | Yes                                                       | Unclear                                    | Yes                                                                                                     |                                         |                                                                |                                                        |                                                  | Yes                                  |                                                          |                                                                         |                                                             |                                            |                                                                |                                                              |                                                  |                                                                          |                                      |                                                          |                                                   |                                            |                  |                       | Moderate risk of bias |
| Kuo, 2013                   | Cohort          | Yes                                                                         | Yes                                                        | Yes                                              | Yes                                  | Yes                                                      | Yes                                                                                     | Yes                                               | Yes                                                                                                   | Yes                                                       | Yes                                        | Yes                                                                                                     | Yes                                     | Yes                                                            | Yes                                                    | Yes                                              | Yes                                  | Yes                                                      | Yes                                                                     | Yes                                                         | Yes                                        | Yes                                                            |                                                              |                                                  |                                                                          |                                      |                                                          |                                                   |                                            |                  |                       | Low risk of bias      |
| Lee, 2014                   | Cohort          | Yes                                                                         | Yes                                                        | Yes                                              | Yes                                  | Yes                                                      | Yes                                                                                     | Yes                                               | Yes                                                                                                   | Yes                                                       | Not applicable                             | Yes                                                                                                     |                                         |                                                                |                                                        |                                                  |                                      |                                                          |                                                                         |                                                             |                                            |                                                                |                                                              |                                                  |                                                                          |                                      |                                                          |                                                   |                                            |                  |                       | Low risk of bias      |
| Lee, 2016                   | Cohort          | Yes                                                                         | Yes                                                        | Yes                                              | Yes                                  | Yes                                                      | Yes                                                                                     | Yes                                               | Yes                                                                                                   | Yes                                                       | Unclear                                    | Unclear                                                                                                 | Yes                                     |                                                                |                                                        |                                                  |                                      |                                                          |                                                                         |                                                             |                                            |                                                                |                                                              |                                                  |                                                                          |                                      |                                                          |                                                   |                                            |                  |                       | Low risk of bias      |
| Leung, 2008                 | Cohort          | Yes                                                                         | Yes                                                        | Yes                                              | Yes                                  | Yes                                                      | Yes                                                                                     | Yes                                               | Yes                                                                                                   | Yes                                                       | Not applicable                             | Yes                                                                                                     |                                         |                                                                |                                                        |                                                  |                                      |                                                          |                                                                         |                                                             |                                            |                                                                |                                                              |                                                  |                                                                          |                                      |                                                          |                                                   |                                            |                  |                       | Low risk of bias      |
| Lin, 2017                   | Cohort          | Yes                                                                         | Yes                                                        | Yes                                              | Yes                                  | Yes                                                      | Yes                                                                                     | Yes                                               | Yes                                                                                                   | Yes                                                       | Yes                                        | Yes                                                                                                     | Yes                                     | Yes                                                            | Yes                                                    | Yes                                              | Yes                                  | Yes                                                      | Yes                                                                     | Yes                                                         | Yes                                        | Yes                                                            |                                                              |                                                  |                                                                          |                                      |                                                          |                                                   |                                            |                  |                       | Low risk of bias      |
| Lin, 2019                   | Cohort          | No                                                                          | Yes                                                        | Yes                                              | Yes                                  | No                                                       | Yes                                                                                     | No                                                | Yes                                                                                                   | Unclear                                                   | No                                         | Yes                                                                                                     |                                         |                                                                |                                                        |                                                  |                                      |                                                          |                                                                         |                                                             |                                            |                                                                |                                                              |                                                  |                                                                          |                                      |                                                          |                                                   |                                            |                  |                       | Moderate risk of bias |
| Peking, 2015                | Cohort          | Yes                                                                         | Yes                                                        | Yes                                              | Yes                                  | Yes                                                      | Yes                                                                                     | Yes                                               | Yes                                                                                                   | Yes                                                       | Not applicable                             | Yes                                                                                                     |                                         |                                                                |                                                        |                                                  |                                      |                                                          |                                                                         |                                                             |                                            |                                                                |                                                              |                                                  |                                                                          |                                      |                                                          |                                                   |                                            |                  |                       | Low risk of bias      |
| Shen, 2014                  | Cohort          | Yes                                                                         | Yes                                                        | Yes                                              | No                                   | Not applicable                                           | Yes                                                                                     | Yes                                               | Yes                                                                                                   | Unclear                                                   | Unclear                                    | Yes                                                                                                     |                                         |                                                                |                                                        |                                                  |                                      |                                                          |                                                                         |                                                             |                                            |                                                                |                                                              |                                                  |                                                                          |                                      |                                                          |                                                   |                                            |                  |                       | Moderate risk of bias |
| Baker, 2012                 | Cross sectional |                                                                             |                                                            |                                                  |                                      |                                                          |                                                                                         |                                                   |                                                                                                       |                                                           |                                            |                                                                                                         |                                         |                                                                |                                                        |                                                  |                                      |                                                          |                                                                         |                                                             |                                            | Yes                                                            | Yes                                                          | Yes                                              | Yes                                                                      | Yes                                  | Yes                                                      | Yes                                               | Yes                                        | Yes              | Yes                   | Low risk of bias      |
| Barnon, 2014 - Diabetes     | Cross sectional |                                                                             |                                                            |                                                  |                                      |                                                          |                                                                                         |                                                   |                                                                                                       |                                                           |                                            |                                                                                                         |                                         |                                                                |                                                        |                                                  |                                      |                                                          |                                                                         |                                                             |                                            | Yes                                                            | Yes                                                          | Yes                                              | Yes                                                                      | Yes                                  | Yes                                                      | Yes                                               | Yes                                        | Yes              | Yes                   | Low risk of bias      |
| Barnon, 2016 - Prediabetes  | Cross sectional |                                                                             |                                                            |                                                  |                                      |                                                          |                                                                                         |                                                   |                                                                                                       |                                                           |                                            |                                                                                                         |                                         |                                                                |                                                        |                                                  |                                      |                                                          |                                                                         |                                                             |                                            | Yes                                                            | Yes                                                          | Yes                                              | Yes                                                                      | Yes                                  | Yes                                                      | Yes                                               | Yes                                        | Yes              | Yes                   | Low risk of bias      |
| Chen, 2006                  | Cross sectional |                                                                             |                                                            |                                                  |                                      |                                                          |                                                                                         |                                                   |                                                                                                       |                                                           |                                            |                                                                                                         |                                         |                                                                |                                                        |                                                  |                                      |                                                          |                                                                         |                                                             |                                            | Yes                                                            | No                                                           | Unclear                                          | Yes                                                                      | Yes                                  | No                                                       | Yes                                               | No                                         | Yes              | No                    | Moderate risk of bias |
| Faulstich-Jackson, 2014     | Cross sectional |                                                                             |                                                            |                                                  |                                      |                                                          |                                                                                         |                                                   |                                                                                                       |                                                           |                                            |                                                                                                         |                                         |                                                                |                                                        |                                                  |                                      |                                                          |                                                                         |                                                             |                                            | No                                                             | No                                                           | Yes                                              | Yes                                                                      | Yes                                  | Yes                                                      | Yes                                               | Yes                                        | Yes              | Yes                   | Moderate risk of bias |
| Hargrett, 2016              | Cross sectional |                                                                             |                                                            |                                                  |                                      |                                                          |                                                                                         |                                                   |                                                                                                       |                                                           |                                            |                                                                                                         |                                         |                                                                |                                                        |                                                  |                                      |                                                          |                                                                         |                                                             |                                            | Yes                                                            | Yes                                                          | Yes                                              | Yes                                                                      | Yes                                  | Yes                                                      | Yes                                               | Yes                                        | Yes              | Yes                   | Low risk of bias      |
| Khewcharonroon, 2016        | Cross sectional |                                                                             |                                                            |                                                  |                                      |                                                          |                                                                                         |                                                   |                                                                                                       |                                                           |                                            |                                                                                                         |                                         |                                                                |                                                        |                                                  |                                      |                                                          |                                                                         |                                                             |                                            | Yes                                                            | Yes                                                          | Unclear                                          | Yes                                                                      | Yes                                  | Yes                                                      | Yes                                               | Yes                                        | Yes              | Yes                   | Low risk of bias      |
| Leake, 2019                 | Cross sectional |                                                                             |                                                            |                                                  |                                      |                                                          |                                                                                         |                                                   |                                                                                                       |                                                           |                                            |                                                                                                         |                                         |                                                                |                                                        |                                                  |                                      |                                                          |                                                                         |                                                             |                                            | Yes                                                            | Yes                                                          | Yes                                              | Yes                                                                      | Yes                                  | Yes                                                      | Yes                                               | Yes                                        | Yes              | Yes                   | Low risk of bias      |
| Shi, 2012                   | Cross sectional |                                                                             |                                                            |                                                  |                                      |                                                          |                                                                                         |                                                   |                                                                                                       |                                                           |                                            |                                                                                                         |                                         |                                                                |                                                        |                                                  |                                      |                                                          |                                                                         |                                                             |                                            | Yes                                                            | Yes                                                          | Unclear                                          | Yes                                                                      | Yes                                  | Yes                                                      | Yes                                               | Yes                                        | Yes              | Yes                   | Low risk of bias      |
| Suwanmehel, 2014 - Adult TB | Cross sectional |                                                                             |                                                            |                                                  |                                      |                                                          |                                                                                         |                                                   |                                                                                                       |                                                           |                                            |                                                                                                         |                                         |                                                                |                                                        |                                                  |                                      |                                                          |                                                                         |                                                             |                                            | Yes                                                            | Yes                                                          | Yes                                              | Yes                                                                      | Yes                                  | Yes                                                      | Yes                                               | Yes                                        | Yes              | Yes                   | Low risk of bias      |
| Suwanmehel, 2014 - TB       | Cross sectional |                                                                             |                                                            |                                                  |                                      |                                                          |                                                                                         |                                                   |                                                                                                       |                                                           |                                            |                                                                                                         |                                         |                                                                |                                                        |                                                  |                                      |                                                          |                                                                         |                                                             |                                            | Yes                                                            | Yes                                                          | Yes                                              | Yes                                                                      | Yes                                  | Yes                                                      | Yes                                               | Yes                                        | Yes              | Yes                   | Low risk of bias      |
| Suwanmehel, 2017            | Cross sectional |                                                                             |                                                            |                                                  |                                      |                                                          |                                                                                         |                                                   |                                                                                                       |                                                           |                                            |                                                                                                         |                                         |                                                                |                                                        |                                                  |                                      |                                                          |                                                                         |                                                             |                                            | Yes                                                            | Yes                                                          | Yes                                              | Yes                                                                      | Yes                                  | Yes                                                      | Yes                                               | Yes                                        | Yes              | Yes                   | Low risk of bias      |
| Tan, 2014                   | Cross sectional |                                                                             |                                                            |                                                  |                                      |                                                          |                                                                                         |                                                   |                                                                                                       |                                                           |                                            |                                                                                                         |                                         |                                                                |                                                        |                                                  |                                      |                                                          |                                                                         |                                                             |                                            | Yes                                                            | Yes                                                          | Unclear                                          | Yes                                                                      | Yes                                  | Yes                                                      | Yes                                               | Yes                                        | Yes              | Yes                   | Low risk of bias      |
| Wang, 2013                  | Cross sectional |                                                                             |                                                            |                                                  |                                      |                                                          |                                                                                         |                                                   |                                                                                                       |                                                           |                                            |                                                                                                         |                                         |                                                                |                                                        |                                                  |                                      |                                                          |                                                                         |                                                             |                                            | Yes                                                            | Yes                                                          | Yes                                              | Yes                                                                      | Yes                                  | Yes                                                      | Yes                                               | Yes                                        | Yes              | Yes                   | Low risk of bias      |
| Wong, 2019                  | Cross sectional |                                                                             |                                                            |                                                  |                                      |                                                          |                                                                                         |                                                   |                                                                                                       |                                                           |                                            |                                                                                                         |                                         |                                                                |                                                        |                                                  |                                      |                                                          |                                                                         |                                                             |                                            | Yes                                                            | Yes                                                          | No                                               | No                                                                       | Yes                                  | No                                                       | No                                                | No                                         | No               | No                    | High risk of bias     |
| Yin, 2007                   | Cross sectional |                                                                             |                                                            |                                                  |                                      |                                                          |                                                                                         |                                                   |                                                                                                       |                                                           |                                            |                                                                                                         |                                         |                                                                |                                                        |                                                  |                                      |                                                          |                                                                         |                                                             |                                            | Yes                                                            | Yes                                                          | Unclear                                          | Yes                                                                      | Yes                                  | Yes                                                      | No                                                | Yes                                        | No               | No                    | Moderate risk of bias |
